# Supplementary material for: Particle-based Imaging Tools Revealing Water Flows in Maize Nodal Vascular Plexus
Source: Preprints.org preprint supplement (doi:10.20944/preprints202205.0096.v1), 2022-05-09
Supplement: Supplementary file 1 [file Table S4.xlsx]

## Sheet: Лист1
Area, px	Area, mkm2	Perimeter, px	Perimeter, mkm	Circularity	Ellipse center X	Ellipse center Y	r, mkm	ϕ, rad	Ellipse radius 1, px	Ellipse radius 1, mkm	Ellipse radius 2, px	Ellipse radius 2, mkm	Ellipse orientation	Ellipse elongation	Hydraulic diameter (Dh), mkm	Reynolds number (Re)
781	371.834	100.803	69.554	0.966	2786.78	2537.18	190.031	0.617	18.037	12.446	13.86	9.563	-60.433	1.301	21.448	0.00541
879	418.492	107.277	74.021	0.96	2754.37	2523.1	213.95	0.594	17.45	12.041	16.141	11.137	29.33	1.081	23.125	0.00584
3060	1456.87	198.37	136.875	0.977	2783.93	2450.62	231.153	0.825	32.554	22.462	29.974	20.682	64.2	1.086	43.034	0.01086
3166	1507.33	202.067	139.426	0.974	2701.46	2561.65	233.226	0.411	35.056	24.189	28.856	19.911	-0.156	1.215	43.481	0.01098
851	405.161	105.611	72.872	0.959	2898.65	3103.75	291.506	-1.301	19.192	13.242	14.172	9.779	30.866	1.354	22.25	0.00562
266	126.643	58.494	40.361	0.977	2889.23	3130.65	311.134	-1.297	9.678	6.678	8.81	6.079	5.514	1.099	12.715	0.00321
2414	1149.31	179.639	123.951	0.94	2816.73	3120.36	321.764	-1.14	32.97	22.749	23.363	16.12	-27.002	1.411	37.201	0.00939
2364	1125.5	172.705	119.166	0.996	2936.95	3179.61	337.214	-1.418	27.866	19.228	27.064	18.674	-76.634	1.03	37.89	0.00956
677	322.32	94.56	65.246	0.951	3524.56	2669.97	354.582	-0.052	16.8	11.592	12.893	8.896	77.37	1.303	19.961	0.00504
1272	605.599	129.38	89.272	0.955	3319.15	3117.98	360.058	0.94	23.8	16.422	17.134	11.822	-43.023	1.389	27.137	0.00685
549	261.379	87.3	60.237	0.905	3265.43	2217.65	374.09	-1.083	15.876	10.954	11.048	7.623	47.744	1.437	17.697	0.00447
838	398.972	104.826	72.33	0.958	3558.52	2672.65	377.898	-0.044	18.373	12.677	14.555	10.043	35.42	1.262	22.266	0.00562
1837	874.596	152.823	105.448	0.988	3380.83	3108.45	381.771	0.84	25.881	17.858	22.635	15.618	45.836	1.143	33.252	0.00839
582	277.09	88.546	61.097	0.933	3344.89	3143.91	385	0.93	16.267	11.224	11.526	7.953	38.07	1.411	18.354	0.00463
481	229.004	80.041	55.228	0.943	3285.3	2201.04	390.694	-1.066	13.156	9.078	11.684	8.062	-86.998	1.126	17.05	0.0043
2220	1056.94	172.015	118.69	0.943	3332.28	2216.84	398.261	-0.981	27.464	18.95	26.076	17.992	35.829	1.053	36.905	0.00932
2788	1327.37	194.577	134.258	0.925	3311.87	3196.44	402.424	1.029	36.135	24.933	24.67	17.022	74.979	1.465	39.763	0.01004
2709	1289.76	191.341	132.025	0.93	3601.44	2730.54	407.824	0.057	35.899	24.77	24.081	16.616	8.309	1.491	39.029	0.00985
2698	1284.52	184.867	127.558	0.992	3257.68	2151.01	413.037	-1.147	31.55	21.77	27.298	18.836	-87.262	1.156	40.289	0.01017
2240	1066.46	175.807	121.307	0.911	3607.99	2632.14	414.065	-0.108	33.942	23.42	21.056	14.529	-13.156	1.612	34.92	0.00881
986	469.435	115.092	79.413	0.935	2488.12	3218.48	509.925	-0.784	20.217	13.95	15.616	10.775	78.987	1.295	24.119	0.00609
2046	974.101	163.089	112.531	0.967	2259.98	2755.36	520.039	-0.078	28.597	19.732	22.841	15.76	-58.031	1.252	34.83	0.00879
847	403.257	105.936	73.096	0.948	2457.71	3228.79	529.894	-0.766	18.902	13.042	14.318	9.879	77.707	1.32	22.273	0.00562
467	222.339	81.382	56.154	0.886	2237.66	2701.97	533.867	-0.007	14.965	10.326	10.001	6.901	34.85	1.496	16.228	0.0041
627	298.515	94.885	65.471	0.875	3708.19	3037.85	535.374	0.455	18.354	12.664	10.925	7.538	-78.374	1.68	18.321	0.00462
2570	1223.58	185.747	128.165	0.936	2400.98	3178.42	536.572	-0.668	35.425	24.443	23.132	15.961	-4.554	1.531	37.799	0.00954
471	224.243	81.612	56.312	0.889	2221.16	2724.07	545.572	-0.035	15.238	10.514	9.896	6.828	-48.713	1.54	16.197	0.00409
2593	1234.53	183.851	126.857	0.964	3712.09	2318.46	549.406	-0.495	31.841	21.97	25.964	17.915	28.841	1.226	39.27	0.00991
435	207.104	77.13	53.22	0.919	2426	3239.49	550.871	-0.748	14.159	9.77	9.915	6.841	-8.148	1.428	15.85	0.004
1070	509.427	116.988	80.722	0.982	3740.23	3048.44	558.448	0.45	20.464	14.12	16.685	11.513	-28.029	1.226	25.238	0.00637
244	116.168	57.938	39.977	0.913	2788.56	3485.92	565.917	-1.296	11.275	7.78	6.938	4.787	23.883	1.625	11.532	0.00291
1934	920.777	159.757	110.232	0.952	2182.2	2701.32	572.129	-0.006	28.549	19.699	21.669	14.952	-32.723	1.318	33.686	0.0085
2138	1017.9	174.831	120.633	0.879	2430.21	3298.25	577.184	-0.803	33.908	23.397	20.13	13.89	-53.242	1.684	33.782	0.00853
975	464.198	121.24	83.656	0.834	2288.05	2275.32	577.561	0.527	24.103	16.631	12.973	8.951	-32.799	1.858	22.293	0.00563
253	120.453	59.049	40.744	0.912	3770.97	3068.81	583.672	0.456	11.283	7.785	7.253	5.005	16.922	1.556	11.908	0.00301
482	229.48	77.915	53.761	0.998	2785.49	3512.03	583.836	-1.301	13.686	9.443	11.283	7.785	83.9	1.213	16.99	0.00429
1937	922.206	168.912	116.549	0.853	3753.07	3115.72	587.835	0.514	33.348	23.01	18.581	12.821	39.6	1.795	31.678	0.008
2111	1005.05	164.565	113.55	0.98	2309.41	2206.1	590.876	0.61	29.505	20.358	22.848	15.765	69.091	1.291	35.255	0.0089
2220	1056.94	168.222	116.073	0.986	2735.4	3509.48	592.333	-1.244	29.289	20.209	24.15	16.664	-57.303	1.213	36.365	0.00918
2583	1229.77	184.962	127.624	0.949	3808.85	3015.55	592.647	0.38	35.074	24.201	23.48	16.201	16.043	1.494	38.079	0.00961
635	302.324	91.973	63.461	0.943	3771.31	2284.02	596.654	-0.497	15.6	10.764	13.076	9.022	71.878	1.193	19.557	0.00494
1518	722.72	139.09	95.972	0.986	2824.94	3541	596.671	-1.354	24.234	16.721	19.955	13.769	-88.806	1.214	30.064	0.00759
841	400.4	106.166	73.255	0.938	2270.03	2248.88	597.569	0.543	17.888	12.343	15.088	10.411	48.707	1.186	22.509	0.00568
1086	517.045	117.448	81.039	0.989	3447.42	3449.56	600.382	1.046	18.992	13.104	18.259	12.599	84.183	1.04	25.688	0.00648
1066	507.523	117.543	81.105	0.97	3793.31	2312.41	601.144	-0.457	20.744	14.313	16.441	11.344	-57.296	1.262	25.146	0.00635
2221	1057.42	174.141	120.157	0.92	2739.72	1857.92	608.283	1.258	32.655	22.532	21.725	14.99	-51.686	1.503	35.3	0.00891
655	311.846	92.989	64.162	0.952	2679.26	1873.35	612.514	1.187	16.297	11.245	12.866	8.878	-45.65	1.267	19.709	0.00497
279	132.832	63.071	43.519	0.881	3479.38	3462.21	619.16	1.022	11.917	8.223	7.527	5.194	84.236	1.583	12.421	0.00314
2493	1186.92	181.86	125.483	0.947	3519.54	3446.09	624.819	0.975	33.327	22.996	23.909	16.497	47.348	1.394	37.914	0.00957
2887	1374.5	191.896	132.408	0.985	2209.56	2271.3	626.25	0.488	32.171	22.198	28.594	19.73	17.046	1.125	41.711	0.01053
2529	1204.06	185.097	127.717	0.928	3426.25	3511.29	630.834	1.1	33.875	23.374	23.845	16.453	59.63	1.421	38.054	0.00961
2657	1265	186.993	129.025	0.955	3820.24	2247.37	638.416	-0.507	33.293	22.972	25.452	17.562	51.802	1.308	39.462	0.00996
1875	892.688	157.861	108.924	0.945	2642.67	1829.5	650.135	1.169	27.729	19.133	21.634	14.927	-69.078	1.282	33.288	0.0084
1074	511.331	123.231	85.029	0.889	3113.92	1752.73	655.097	-1.463	22.762	15.706	15.348	10.59	25.616	1.483	24.835	0.00627
2102	1000.76	163.319	112.69	0.99	2078.63	2488.6	659.396	0.219	27.459	18.947	24.5	16.905	35.786	1.121	35.678	0.00901
897	427.062	119.344	82.347	0.791	3395.29	1815.04	663.455	-1.16	25.267	17.434	11.37	7.845	65.185	2.222	20.235	0.00511
820	390.402	103.485	71.405	0.962	3131.36	1724.3	675.971	-1.448	18.177	12.542	14.429	9.956	21.58	1.26	22.056	0.00557
1948	927.443	159.852	110.298	0.958	3475.78	1830.82	677.903	-1.078	28.972	19.991	21.597	14.902	-25.216	1.341	33.793	0.00853
1057	503.238	118.558	81.805	0.945	3421.72	1800.25	680.21	-1.141	21.274	14.679	15.896	10.968	80.68	1.338	24.851	0.00627
2154	1025.52	168.682	116.391	0.951	3191.57	1710.95	691.366	-1.39	30.948	21.354	22.183	15.306	-54.456	1.395	35.187	0.00888
175	83.318	47.442	32.735	0.977	3151.44	1701.89	693.116	-1.431	8.756	6.042	6.416	4.427	-69.978	1.365	10.1	0.00255
164	78.08	46.102	31.81	0.97	3134.55	1698.06	694.213	-1.448	7.979	5.506	6.597	4.552	-87.29	1.209	9.923	0.0025
268	127.595	59.279	40.903	0.958	3446.76	1780.94	699.585	-1.127	10.593	7.309	8.178	5.643	-51.827	1.295	12.634	0.00319
631	300.419	89.752	61.929	0.984	2015.8	2486.72	702.034	0.208	15.491	10.689	13.031	8.991	-12.916	1.189	19.461	0.00491
2637	1255.48	187.414	129.316	0.943	3087.55	1671.29	709.406	-1.497	34.448	23.769	24.475	16.888	-83.822	1.407	38.939	0.00983
2282	1086.46	177.608	122.55	0.909	3418.64	1733.85	721.291	-1.171	32.681	22.55	22.551	15.56	-58.39	1.449	36.224	0.00914
1115	530.852	135.108	93.225	0.768	4058.68	2506.65	734.435	-0.179	29.456	20.325	12.134	8.372	49.854	2.427	21.895	0.00553
1849	880.309	154.069	106.308	0.979	1963.15	2488.75	737.347	0.196	26.509	18.291	22.252	15.354	78.672	1.191	33.262	0.0084
1628	775.091	144.453	99.673	0.98	3860.36	3366.32	746.138	0.668	25.151	17.354	20.681	14.27	-79.228	1.216	31.175	0.00787
1254	597.029	129.935	89.655	0.933	4083.78	2485.39	754.177	-0.194	23.654	16.321	17.056	11.769	59.749	1.387	27	0.00682
2025	964.103	159.948	110.364	0.995	3801.54	1938.18	755.72	-0.765	27.803	19.184	23.235	16.032	0.056	1.197	34.795	0.00878
2143	1020.28	169.888	117.223	0.933	2469.28	1723.62	768.511	1.062	29.784	20.551	23.152	15.975	15.605	1.286	35.674	0.009
511	243.287	83.508	57.621	0.921	2526.77	1691.51	769.908	1.122	15.15	10.454	10.768	7.43	-65.355	1.407	17.13	0.00432
535	254.714	82.723	57.079	0.982	4113.76	2481.47	775.001	-0.193	13.672	9.434	12.516	8.636	-46.221	1.092	18.017	0.00455
2057	979.338	161.423	111.382	0.992	4103.12	2427.02	775.939	-0.242	26.835	18.516	24.435	16.86	-20.763	1.098	35.26	0.0089
454	216.149	76.574	52.836	0.973	3805.81	1897.85	777.325	-0.788	13.208	9.114	10.994	7.586	10.105	1.201	16.491	0.00416
669	318.511	94.099	64.928	0.949	2502.12	1680.46	784.253	1.106	16.24	11.206	13.189	9.1	13.054	1.231	19.98	0.00504
427	203.295	82.858	57.172	0.782	3886.01	3437.27	790.826	0.703	18.36	12.668	7.534	5.198	47.6	2.437	13.602	0.00343
2669	1270.71	185.978	128.325	0.97	4147.4	2531.34	792.116	-0.144	31.985	22.07	26.607	18.359	1.921	1.202	39.921	0.01008
975	464.198	112.18	77.404	0.974	3907.33	3420.23	794.672	0.679	20.13	13.89	15.517	10.707	51.296	1.297	23.985	0.00605
2869	1365.93	190.785	131.642	0.99	3790.56	1845.4	796.25	-0.83	33.126	22.857	27.597	19.042	-23.315	1.2	41.38	0.01044
633	301.371	90.863	62.695	0.963	4130.53	2988.05	797.98	0.255	16.586	11.444	12.22	8.432	70.773	1.357	19.2	0.00485
2492	1186.44	181.305	125.1	0.953	4151.67	2924.34	802.349	0.197	33.554	23.152	23.686	16.343	-31.696	1.417	37.764	0.00953
2330	1109.31	174.371	120.316	0.963	2514.67	1624.35	815.375	1.137	30.796	21.249	24.246	16.73	44.484	1.27	37.179	0.00938
544	258.998	88.411	61.004	0.875	2046.59	3388.94	819.37	-0.622	17.608	12.15	9.904	6.834	66.745	1.778	16.847	0.00425
836	398.02	104.04	71.788	0.971	4167.18	2969.32	819.416	0.232	17.814	12.292	15.055	10.388	-17.923	1.183	22.441	0.00566
1695	806.99	148.571	102.514	0.965	3956.85	3429.99	825.641	0.66	23.866	16.468	22.766	15.709	-25.888	1.048	32.15	0.00812
889	423.253	109.173	75.329	0.937	2019.01	3400.66	839.555	-0.617	19.211	13.256	14.801	10.213	69.738	1.298	22.883	0.00578
504	239.954	80.597	55.612	0.975	1865.17	3152.3	851.092	-0.378	14.654	10.111	10.981	7.577	-77.601	1.334	17.15	0.00433
2380	1133.12	173.49	119.708	0.994	4201.38	3025.53	851.904	0.27	28.486	19.655	26.67	18.402	32.773	1.068	37.995	0.00959
230	109.503	54.472	37.586	0.974	1776.61	2700.11	851.984	-0.003	10.084	6.958	7.309	5.043	69.464	1.38	11.549	0.00292
783	372.786	100.248	69.171	0.979	2191.61	1763.44	857.035	0.85	16.684	11.512	15	10.35	-69.593	1.112	21.77	0.0055
1819	866.026	155.275	107.14	0.948	2225.08	1727.82	860.914	0.889	28.07	19.368	20.722	14.298	-58.19	1.355	32.536	0.00821
543	258.522	83.508	57.621	0.978	1989.65	3418.62	863.252	-0.615	15.19	10.481	11.443	7.896	-36.589	1.327	17.838	0.0045
254	120.929	58.494	40.361	0.933	1753.7	2705.2	867.811	-0.007	10.922	7.536	7.49	5.168	-16.122	1.458	12.055	0.00304
2296	1093.13	172.8	119.232	0.966	1754.25	2752.54	868.269	-0.044	31.113	21.468	23.532	16.237	-19.707	1.322	36.628	0.00925
2175	1035.52	166.882	115.149	0.981	1955.24	3381.43	868.523	-0.575	29.42	20.3	23.579	16.27	-16.091	1.248	35.909	0.00906
537	255.666	83.048	57.303	0.978	2159.87	1766.97	869.848	0.829	13.406	9.25	12.904	8.904	-40.73	1.039	18.144	0.00458
598	284.708	87.856	60.621	0.974	1830.28	3152.52	873.564	-0.368	15.874	10.953	12.027	8.299	-18.394	1.32	18.709	0.00472
2263	1077.41	174.601	120.475	0.933	1809.25	3103.66	875.727	-0.327	32.441	22.384	22.273	15.368	-12.918	1.457	35.835	0.00905
2698	1284.52	189.349	130.651	0.946	1994.93	3471.6	881.953	-0.651	34.534	23.828	24.93	17.202	-43.845	1.385	39.449	0.00996
465	221.387	78.7	54.303	0.943	2165.33	1735.26	883.614	0.849	14.232	9.82	10.441	7.204	-51.592	1.363	16.429	0.00415
1742	829.366	152.268	105.065	0.944	1728.25	2669.83	885.544	0.021	27.253	18.805	20.431	14.097	0.239	1.334	31.903	0.00805
679	323.272	92.433	63.779	0.999	2980.46	3992.71	894.578	-1.547	15.122	10.434	14.333	9.89	-15.157	1.055	20.302	0.00512
2309	1099.32	174.045	120.091	0.958	1816.99	3210.95	897.288	-0.407	32.059	22.121	22.999	15.869	-24.086	1.394	36.471	0.00921
999	475.624	115.092	79.413	0.948	4250.93	2252.77	908.47	-0.344	20.493	14.14	15.587	10.755	33.751	1.315	24.212	0.00611
558	265.664	105.746	72.965	0.627	1790.27	2202.66	908.871	0.384	23.646	16.316	7.908	5.457	-50.342	2.99	14.638	0.00369
2191	1043.13	167.667	115.69	0.979	2127.76	1715.81	910.871	0.837	28.797	19.87	24.29	16.76	-61.611	1.186	36.236	0.00915
2424	1154.07	176.822	122.007	0.974	2941.65	4027.07	919.291	-1.518	30.02	20.714	25.744	17.763	-81.585	1.166	38.139	0.00963
341	162.35	67.419	46.519	0.943	2991.35	4029.67	919.93	-1.556	12.672	8.744	8.636	5.959	-88.818	1.467	13.928	0.00352
2237	1065.04	170.904	117.924	0.962	3035.27	4033.44	922.575	1.553	30.111	20.777	23.756	16.392	59.598	1.268	36.399	0.00919
710	338.031	95.67	66.012	0.975	2507.99	3943.51	927.835	-1.187	17.273	11.918	13.142	9.068	16.548	1.314	20.412	0.00515
2130	1014.09	165.446	114.158	0.978	4255.87	2184.49	928.566	-0.39	28.703	19.805	23.743	16.383	-36.215	1.209	35.705	0.00901
1040	495.144	115.877	79.955	0.973	1761.95	2194.39	929.134	0.382	18.602	12.835	17.832	12.304	49.263	1.043	25.122	0.00634
790	376.119	100.708	69.489	0.979	4280.21	2230.13	932.789	-0.352	16.315	11.257	15.495	10.692	-5.139	1.053	21.927	0.00553
803	382.308	109.959	75.872	0.835	1773.27	2131.34	939.109	0.428	22.325	15.404	11.542	7.964	68.182	1.934	20.01	0.00505
513	244.239	82.493	56.92	0.947	3321.05	4026.18	941.974	1.342	15.309	10.563	10.744	7.413	33.362	1.425	17.163	0.00433
686	326.605	93.774	64.704	0.98	2506.45	3975.59	948.789	-1.195	15.374	10.608	14.264	9.842	59.668	1.078	20.407	0.00515
2247	1069.8	173.03	119.391	0.943	1707.38	2230.53	955.489	0.343	29.441	20.314	24.421	16.85	12.102	1.206	36.682	0.00926
1640	780.804	150.142	103.598	0.914	1743.25	2135.22	956.898	0.417	27.268	18.815	19.301	13.318	62.298	1.413	30.746	0.00776
2749	1308.8	190.23	131.259	0.955	4332.74	2263.11	959.559	-0.317	33.979	23.446	25.921	17.885	-12.312	1.311	40.22	0.01015
521	248.048	82.723	57.079	0.957	3326.17	4058.34	964.385	1.344	14.414	9.946	11.552	7.971	60.916	1.248	17.593	0.00444
2629	1251.67	186.763	128.866	0.947	2540.31	4022.88	971.143	-1.23	35.112	24.227	23.906	16.495	88.112	1.469	38.565	0.00973
1783	848.886	160.083	110.457	0.874	2453.15	3994.23	974.701	-1.165	30.019	20.713	19.208	13.254	-80.844	1.563	31.577	0.00797
2740	1304.51	191.015	131.8	0.944	3281.01	4088.62	978.353	1.379	33.991	23.454	25.749	17.767	77.337	1.32	40.057	0.01011
2012	957.913	162.994	112.466	0.952	3376.1	4088.37	992.754	1.314	29.665	20.469	21.658	14.944	66.947	1.37	34.138	0.00862
1812	862.693	152.593	105.289	0.978	4437.76	2459.37	997.731	-0.165	26.238	18.104	22.156	15.288	-33.329	1.184	33.037	0.00834
2314	1101.69	172.475	119.008	0.978	2184.13	3886.01	999.676	-0.963	30.51	21.052	24.23	16.719	17.566	1.259	37.031	0.00935
243	115.692	56.598	39.053	0.953	4445.17	2936.88	1003.12	0.166	10.347	7.139	7.571	5.224	-83.399	1.367	11.924	0.00301
1980	942.678	161.328	111.316	0.956	1883.4	1777.43	1003.98	0.684	28.467	19.642	22.254	15.355	-10.11	1.279	34.216	0.00864
586	278.995	86.745	59.854	0.979	4468.35	2500.35	1014.4	-0.134	14.1	9.729	13.286	9.167	-75.023	1.061	18.871	0.00476
1523	725.1	140.661	97.056	0.967	2697.12	1255.91	1017.44	1.356	25.102	17.32	19.352	13.353	-40.356	1.297	29.911	0.00755
727	346.125	99.788	68.854	0.917	3868.57	3905.92	1022.8	0.954	18.986	13.1	12.319	8.5	23.003	1.541	20.168	0.00509
435	207.104	75.694	52.229	0.954	3617.29	4050.25	1023.33	1.15	13.783	9.51	10.126	6.987	-25.813	1.361	15.926	0.00402
860	409.446	106.166	73.255	0.959	4477.34	2926.91	1023.93	0.156	17.779	12.268	15.462	10.669	-9.701	1.15	22.77	0.00575
137	65.226	41.524	28.652	0.998	2188.18	3935.04	1026.08	-0.984	6.8	4.692	6.496	4.482	-10.235	1.047	9.167	0.00231
602	286.612	87.626	60.462	0.985	4275.44	1910.2	1027.22	-0.557	15.189	10.48	12.67	8.742	-10.214	1.199	18.987	0.00479
439	209.008	76.019	52.453	0.955	1873.95	1729.42	1030.19	0.705	13.288	9.169	10.576	7.297	-62.451	1.256	16.149	0.00408
2041	971.72	162.994	112.466	0.965	1910.64	1684.68	1031.67	0.743	28.49	19.658	22.888	15.793	0.153	1.245	34.823	0.00879
1183	563.226	127.714	88.123	0.911	2210.09	3963.02	1034.05	-1.007	24.505	16.908	15.423	10.642	-61.951	1.589	25.474	0.00643
205	97.601	52.02	35.894	0.952	3633.61	4068.55	1039.47	1.145	8.912	6.149	7.404	5.109	-27.624	1.204	11.115	0.00281
364	173.3	70.005	48.303	0.933	2183.8	3956.26	1039.96	-0.99	12.556	8.664	9.289	6.409	-45.086	1.352	14.573	0.00368
1914	911.255	159.297	109.915	0.948	3833.42	3960.73	1040.46	0.994	30.03	20.721	20.342	14.036	83.504	1.476	32.869	0.0083
256	121.882	57.938	39.977	0.958	2652.1	1230.61	1041.46	1.33	9.932	6.853	8.259	5.699	77.334	1.203	12.394	0.00313
1381	657.494	133.862	92.365	0.968	4377.72	3338.68	1041.69	0.439	23.403	16.148	18.898	13.04	62.807	1.238	28.695	0.00724
818	389.45	104.27	71.946	0.945	3882.42	3935.55	1045.02	0.958	19.011	13.118	13.758	9.493	45.889	1.382	21.752	0.00549
1654	787.469	147.69	101.906	0.953	4513.22	2494.88	1045.59	-0.134	25.712	17.741	20.613	14.223	-59.946	1.247	31.387	0.00792
270	128.547	60.065	41.445	0.94	2674.47	1218.74	1045.88	1.347	10.908	7.527	7.939	5.478	-32.694	1.374	12.528	0.00316
796	378.976	109.173	75.329	0.839	3429.97	1239.14	1046.3	-1.291	22.215	15.328	11.511	7.943	-17.32	1.93	19.947	0.00503
695	330.89	96.781	66.779	0.932	1846.63	1723.57	1047.2	0.696	18.248	12.591	12.186	8.408	-69.263	1.497	19.777	0.00499
550	261.855	83.278	57.462	0.997	4043.14	3809.84	1047.32	0.823	13.736	9.478	12.819	8.845	31.834	1.071	18.29	0.00462
950	452.295	110.744	76.413	0.973	3673.26	1328.7	1048.53	-1.12	17.983	12.408	16.89	11.654	24.987	1.065	24.027	0.00606
1763	839.364	155.18	107.074	0.92	4277.68	1855.29	1049.02	-0.586	29.472	20.336	19.122	13.194	-38.184	1.541	31.306	0.0079
1956	931.252	164.43	113.457	0.909	4325.68	1930.81	1049.58	-0.528	31.567	21.781	19.79	13.655	-13.793	1.595	32.723	0.00826
2252	1072.18	172.57	119.073	0.95	4507.15	2991.8	1052	0.195	31.765	21.918	22.637	15.62	4.76	1.403	35.978	0.00908
465	221.387	78.145	53.92	0.957	3075.74	1171.4	1053.32	-1.529	14.083	9.717	10.545	7.276	-9.221	1.336	16.473	0.00416
2274	1082.65	174.926	120.699	0.934	4526.36	2893.63	1054.15	0.129	32.663	22.537	22.186	15.308	0.169	1.472	35.817	0.00904
408	194.249	73.567	50.761	0.947	3644.83	4094.46	1058.94	1.145	13.952	9.627	9.36	6.458	66.124	1.491	15.169	0.00383
3126	1488.29	206.644	142.584	0.92	3603.02	4114.38	1060.04	1.175	39.923	27.547	25.014	17.26	68.767	1.596	41.369	0.01044
2956	1407.35	202.527	139.744	0.906	3684.45	4079.26	1061.08	1.118	39.293	27.112	24.008	16.566	47.846	1.637	39.983	0.01009
1867	888.879	157.726	108.831	0.943	3372.03	1198.45	1063.25	-1.335	29.366	20.263	20.321	14.021	86.462	1.445	32.611	0.00823
166	79.033	46.887	32.352	0.949	3899.74	3956.52	1063.73	0.957	7.621	5.258	7.109	4.905	-31.268	1.072	10.145	0.00256
1223	582.27	126.928	87.58	0.954	3434.29	1205.68	1069.32	-1.294	22.715	15.673	17.187	11.859	-18.745	1.322	26.748	0.00675
587	279.471	87.53	60.396	0.963	4413.09	3360.38	1070.15	0.442	14.925	10.298	12.582	8.682	36.356	1.186	18.774	0.00474
326	155.209	68.204	47.061	0.881	3687.64	1299.03	1071.29	-1.12	13.642	9.413	7.649	5.278	-79.692	1.783	13.021	0.00329
2028	965.531	161.749	111.607	0.974	2649.96	1186.52	1071.38	1.336	29.127	20.098	22.215	15.328	-35.106	1.311	34.473	0.0087
577	274.71	85.96	59.312	0.981	3081.52	1143.94	1072.42	-1.526	14.755	10.181	12.528	8.644	-43.811	1.178	18.637	0.0047
521	248.048	84.389	58.228	0.919	2755.64	4230.5	1073.01	-1.406	15.511	10.703	10.738	7.409	11.173	1.444	17.23	0.00435
356	169.492	69.775	48.145	0.919	4075.22	3833.77	1074.49	0.819	12.706	8.767	8.997	6.208	44.649	1.412	14.33	0.00362
1686	802.705	150.602	103.915	0.934	3658.74	1277.38	1076.32	-1.143	27.681	19.1	19.577	13.508	-76.106	1.414	31.194	0.00787
1706	812.227	155.505	107.298	0.887	3728.83	1310.81	1076.74	-1.093	29.861	20.604	18.434	12.719	-37.425	1.62	30.612	0.00773
133	63.321	42.079	29.035	0.944	3407.08	1184.86	1078.24	-1.315	8.144	5.619	5.238	3.614	-86.321	1.555	8.597	0.00217
2022	962.674	161.653	111.541	0.972	4449.51	3308.49	1078.41	0.402	28.049	19.354	22.997	15.868	6.253	1.22	34.707	0.00876
936	445.63	110.284	76.096	0.967	1473.23	2415.27	1078.92	0.181	18.854	13.009	15.939	10.998	7.671	1.183	23.755	0.006
1780	847.458	154.489	106.597	0.937	4108.11	3814.8	1080.73	0.795	29.322	20.232	19.377	13.37	36.626	1.513	31.55	0.00796
2574	1225.48	182.971	126.25	0.966	2169.83	4021.26	1082.86	-1.005	31.425	21.683	26.107	18.014	7.115	1.204	39.191	0.00989
1921	914.588	162.859	112.373	0.91	1457.86	2463.74	1083.89	0.149	30.688	21.175	20.122	13.884	-20.441	1.525	32.84	0.00829
1898	903.638	158.186	109.148	0.953	3135.29	1124.4	1088.18	-1.492	29.509	20.361	20.574	14.196	-61.124	1.434	32.937	0.00831
260	123.786	57.153	39.436	1	3427.97	1174.92	1088.59	-1.304	9.455	6.524	8.786	6.062	-44.953	1.076	12.561	0.00317
386	183.775	71.671	49.453	0.944	4441.63	3362.56	1088.62	0.436	13.678	9.438	9.054	6.247	16.704	1.511	14.734	0.00372
2321	1105.03	175.481	121.082	0.947	1971.67	3883.28	1088.63	-0.851	31.189	21.52	23.777	16.406	88.847	1.312	36.902	0.00931
2904	1382.59	203.637	140.51	0.88	4059.01	3881.09	1091.12	0.847	40.744	28.113	22.731	15.684	47.866	1.792	38.74	0.00978
1071	509.903	118.558	81.805	0.957	1923.1	3846.87	1092.61	-0.813	20.215	13.948	16.962	11.704	-32.144	1.192	25.359	0.0064
1176	559.894	127.158	87.739	0.914	3959.45	1427.12	1093.26	-0.929	24.137	16.655	15.579	10.75	61.609	1.549	25.546	0.00645
576	274.234	87.3	60.237	0.95	2755.94	4261.06	1093.77	-1.409	14.797	10.21	12.569	8.673	-79.834	1.177	18.696	0.00472
1695	806.99	150.277	103.691	0.943	3053	1111.24	1094.27	-1.545	26.733	18.446	20.584	14.203	86.087	1.299	31.83	0.00803
120	57.132	42.309	29.193	0.842	3448.66	1169.52	1096.03	-1.292	8.562	5.908	4.527	3.124	-82.751	1.891	7.811	0.00197
1800	856.98	153.839	106.149	0.956	1453.92	2365.61	1098.64	0.209	27.672	19.094	20.765	14.328	-13.219	1.333	32.414	0.00818
2673	1272.62	190.23	131.259	0.928	3944.57	3987.65	1099.18	0.945	35.631	24.585	23.988	16.552	67.166	1.485	38.835	0.0098
976	464.674	112.735	77.787	0.965	4286.28	3652.51	1099.5	0.643	19.878	13.716	15.711	10.841	-72.834	1.265	24.056	0.00607
2315	1102.17	172.475	119.008	0.978	2705.77	4267.47	1104.22	-1.379	30.158	20.809	24.479	16.891	-52.539	1.232	37.093	0.00936
1820	866.502	153.283	105.765	0.973	3479.37	1165.99	1104.38	-1.274	27.028	18.649	21.48	14.821	-73.791	1.258	32.818	0.00828
2283	1086.94	174.236	120.223	0.945	2792.21	4283.92	1105.65	-1.434	31.02	21.404	23.576	16.267	-74.58	1.316	36.631	0.00925
236	112.36	56.598	39.053	0.926	1922.6	3876.55	1107.81	-0.826	8.931	6.162	8.502	5.866	-34.555	1.05	12.017	0.00303
1588	756.047	151.157	104.298	0.873	4455.05	3409.06	1110.85	0.458	29.973	20.681	16.913	11.67	21.471	1.772	28.747	0.00726
221	105.218	55.257	38.127	0.91	3992.59	1415.27	1113.57	-0.917	10.635	7.338	6.679	4.609	-26.039	1.592	11.039	0.00279
202	96.172	52.575	36.277	0.918	4191.68	1587.7	1117.46	-0.754	9.295	6.414	7.017	4.842	78.72	1.325	10.93	0.00276
592	281.851	87.856	60.621	0.964	3979.82	1396.54	1118.57	-0.931	14.587	10.065	12.988	8.962	-38.499	1.123	18.931	0.00478
1919	913.636	159.987	110.391	0.942	4028.23	1433.11	1119.08	-0.893	29.771	20.542	20.573	14.195	-28.513	1.447	33.03	0.00834
670	318.987	94.33	65.088	0.946	2412.72	1188.21	1119.76	1.193	17.347	11.969	12.334	8.51	-84.373	1.407	19.617	0.00495
438	208.532	77.59	53.537	0.914	4318.22	3662.02	1121.1	0.636	13.636	9.409	10.359	7.148	20.914	1.316	16.099	0.00406
1890	899.829	158.972	109.691	0.94	4344.99	3635.36	1125.32	0.613	29.082	20.067	20.721	14.297	28.991	1.404	32.934	0.00831
326	155.209	65.983	45.528	0.941	4205.89	1570.98	1132.5	-0.756	11.05	7.625	9.445	6.517	-45.937	1.17	14.012	0.00354
771	367.073	100.248	69.171	0.964	1438.74	3193.79	1138.05	-0.306	16.646	11.486	14.78	10.198	81.176	1.126	21.569	0.00544
1739	827.938	157.726	108.831	0.878	2441.47	1148.26	1138.42	1.218	31.31	21.604	17.735	12.237	78.156	1.765	30.116	0.0076
1623	772.71	145.009	100.056	0.97	4315.12	3708.77	1138.87	0.66	25.449	17.56	20.409	14.082	43.151	1.247	31.073	0.00784
863	410.874	106.492	73.479	0.956	3125.84	4343.72	1139.26	1.501	19.387	13.377	14.233	9.821	-6.739	1.362	22.391	0.00565
283	134.736	63.071	43.519	0.894	2400.16	1160.28	1140.86	1.192	11.804	8.145	7.748	5.346	-80.167	1.523	12.641	0.00319
2378	1132.17	176.497	121.783	0.959	1876.92	3902.09	1142.19	-0.816	31.414	21.676	24.139	16.656	-83.366	1.301	37.356	0.00943
2168	1032.18	172.149	118.783	0.919	3974.2	1348.91	1142.84	-0.95	32.578	22.479	21.282	14.685	-44.273	1.531	34.773	0.00878
2533	1205.96	181.86	125.483	0.962	4204.89	1523.68	1154.64	-0.777	33.234	22.931	24.309	16.773	-48.067	1.367	38.291	0.00967
1240	590.364	126.928	87.58	0.967	4265.4	1585.8	1155.92	-0.725	23.489	16.207	16.845	11.623	-58.093	1.394	26.715	0.00674
1933	920.301	158.416	109.307	0.968	2353.12	1149.63	1160.02	1.168	26.575	18.337	23.288	16.069	-86.408	1.141	34.182	0.00863
657	312.798	94.56	65.246	0.923	1411.48	2175.34	1161.03	0.315	16.926	11.679	12.448	8.589	-87.297	1.36	19.571	0.00494
1152	548.467	121.47	83.814	0.981	3135	4376.15	1162.03	1.497	20.321	14.021	18.082	12.477	-26.076	1.124	26.363	0.00665
1908	908.399	162.534	112.148	0.908	1384.57	3171.89	1169.42	-0.284	30.733	21.206	19.821	13.676	-16.709	1.551	32.508	0.00821
2406	1145.5	177.512	122.483	0.96	1412.41	3265.06	1170.93	-0.342	32.372	22.337	23.702	16.354	-35.684	1.366	37.322	0.00942
619	294.706	91.743	63.303	0.924	4647.47	3181.42	1177.43	0.288	17.61	12.151	11.267	7.774	-83.478	1.563	18.522	0.00468
273	129.975	60.945	42.052	0.924	1383.06	2174.27	1179.92	0.31	11.26	7.769	7.854	5.419	13.872	1.434	12.571	0.00317
1960	933.156	161.883	111.699	0.94	3192.7	4403.5	1184.4	1.465	30.288	20.899	20.635	14.238	70.627	1.468	33.282	0.0084
1273	606.075	134.053	92.497	0.89	1362.44	2211.77	1185.92	0.286	26.252	18.114	15.472	10.676	-3.827	1.697	26.014	0.00657
586	278.995	87.626	60.462	0.959	3149.61	4413.32	1188.38	1.49	16.232	11.2	11.524	7.952	69.964	1.408	18.339	0.00463
804	382.784	101.914	70.321	0.973	1948.7	1335.75	1191.35	0.908	18.425	12.713	13.922	9.606	-20.763	1.324	21.677	0.00547
1418	675.11	138.535	95.589	0.928	1379.55	2121.48	1193.84	0.339	25.816	17.813	17.53	12.096	7.486	1.473	28.304	0.00714
666	317.083	92.759	64.004	0.973	4676.85	3185.02	1197.59	0.285	16.052	11.076	13.268	9.155	-44.288	1.21	19.959	0.00504
2163	1029.8	168.222	116.073	0.961	3103.9	4429.94	1197.71	1.517	29.593	20.419	23.361	16.119	68.706	1.267	35.785	0.00903
151	71.891	44.436	30.661	0.961	3280.01	981.493	1197.85	-1.415	7.271	5.017	6.707	4.628	36.112	1.084	9.621	0.00243
252	119.977	57.383	39.594	0.962	2632.54	999.456	1199.84	1.351	10.085	6.959	8.026	5.538	-15.286	1.257	12.256	0.00309
584	278.042	89.197	61.546	0.922	4669.44	2157.82	1202.96	-0.314	16.323	11.263	11.441	7.894	-82.262	1.427	18.284	0.00462
492	234.241	79.256	54.687	0.984	1288.23	2967.84	1203.6	-0.156	13.507	9.32	11.637	8.03	-46.387	1.161	17.207	0.00434
1351	643.211	132.291	91.281	0.97	3318.43	971.605	1208.95	-1.395	21.825	15.059	19.93	13.752	83.099	1.095	28.722	0.00725
1443	687.012	136.964	94.505	0.967	4704.37	3151.21	1209.56	0.262	24.185	16.688	19.024	13.127	4.844	1.271	29.182	0.00737
118	56.18	39.858	27.502	0.933	3284.28	960.449	1212.65	-1.415	7.65	5.279	4.965	3.426	-65.121	1.541	8.128	0.00205
144	68.558	43.65	30.119	0.95	4764.12	2549.54	1213.65	-0.084	8.009	5.526	5.775	3.985	-77.075	1.387	9.142	0.00231
1541	733.67	144.779	99.898	0.924	4687.88	3231.48	1214.24	0.309	26.549	18.319	18.547	12.797	9.36	1.431	29.672	0.00749
1370	652.257	133.632	92.206	0.964	2659.66	971.372	1214.88	1.37	22.434	15.479	19.611	13.532	70.904	1.144	28.816	0.00727
165	78.557	49.109	33.885	0.86	2627.11	973.573	1218.09	1.351	10.458	7.216	5.08	3.505	83.619	2.059	8.917	0.00225
679	323.272	93.314	64.387	0.98	4698.51	2155.52	1222.53	-0.31	16.532	11.407	13.13	9.06	85.042	1.259	20.066	0.00506
1864	887.45	156.616	108.065	0.955	3255.16	939.078	1224.3	-1.433	25.815	17.812	23.248	16.041	79.788	1.11	33.714	0.00851
124	59.036	40.969	28.269	0.928	2900.9	4469.24	1225.5	-1.509	7.478	5.16	5.39	3.719	15.215	1.387	8.533	0.00215
1849	880.309	154.719	106.756	0.971	2594.18	969.644	1225.87	1.334	27.991	19.314	21.109	14.565	71.115	1.326	32.892	0.0083
709	337.555	95.115	65.629	0.985	1918.13	1293.47	1227.33	0.909	16.298	11.246	13.878	9.576	-26.573	1.174	20.622	0.00521
164	78.08	45.316	31.268	1.004	1251.66	2973.75	1229.16	-0.156	7.389	5.098	7.139	4.926	-30.75	1.035	10.02	0.00253
265	126.167	60.16	41.51	0.92	4787.96	2552.26	1229.89	-0.081	11.697	8.071	7.252	5.004	-13.856	1.613	12.029	0.00304
2395	1140.26	178.718	123.315	0.942	4725.36	2203.28	1230.67	-0.28	32.559	22.466	23.448	16.179	14.52	1.389	37.134	0.00937
1774	844.601	152.728	105.382	0.956	2864.58	917.039	1232.06	1.489	27.518	18.987	20.589	14.206	73.052	1.337	32.172	0.00812
527	250.905	103.294	71.273	0.621	1588.62	1617.51	1232.11	0.649	23.434	16.169	7.367	5.083	-43.263	3.181	13.715	0.00346
381	181.394	73.567	50.761	0.885	2375.07	4369.65	1235.08	-1.207	14.087	9.72	8.698	6.002	15.273	1.62	14.444	0.00365
1435	683.204	139.32	96.131	0.929	4799.93	2583.48	1236.58	-0.063	26.034	17.963	17.592	12.138	-5.421	1.48	28.446	0.00718
1712	815.083	151.483	104.523	0.938	1233.2	2938.58	1238.24	-0.135	27.839	19.209	19.617	13.536	-21.763	1.419	31.296	0.0079
2163	1029.8	166.556	114.924	0.98	2940.22	903.199	1238.41	1.531	27.65	19.079	25.052	17.286	-16.864	1.104	36.233	0.00915
1259	599.41	130.395	89.973	0.93	4797.55	2512.95	1238.96	-0.102	23.408	16.152	17.248	11.901	-34.363	1.357	27.099	0.00684
1861	886.022	156.616	108.065	0.953	1240.96	3020.8	1241.89	-0.181	27.767	19.159	21.576	14.887	-16.435	1.287	33.249	0.00839
1882	896.02	155.18	107.074	0.982	2870.87	4493.4	1243.58	-1.493	26.722	18.438	22.476	15.508	70.551	1.189	33.568	0.00847
475	226.148	81.382	56.154	0.901	2128.35	1123.56	1244.71	1.059	15.818	10.914	9.602	6.625	-18.505	1.647	16.018	0.00404
599	285.184	89.197	61.546	0.946	1574.69	1598.97	1247.51	0.652	15.25	10.523	12.574	8.676	-38.373	1.213	18.934	0.00478
1670	795.087	146.35	100.982	0.98	2935.37	4504.92	1248.85	-1.529	25.414	17.536	20.961	14.463	69.715	1.212	31.559	0.00797
1613	767.949	150.697	103.981	0.893	4819.69	2776.85	1248.97	0.044	28.845	19.903	17.931	12.372	-6.512	1.609	29.719	0.0075
1963	934.584	161.423	111.382	0.947	1948.53	1231.13	1249.11	0.943	29.275	20.2	21.395	14.763	65.399	1.368	33.712	0.00851
842	400.876	106.492	73.479	0.933	2369.06	4393.89	1252.19	-1.209	18.464	12.74	14.564	10.049	16.746	1.268	22.316	0.00563
224	106.646	53.916	37.202	0.968	3678.48	4384.66	1252.42	1.194	9.468	6.533	7.576	5.227	-5.497	1.25	11.544	0.00291
634	301.847	90.537	62.471	0.972	1533.3	3753.46	1253.76	-0.621	15.506	10.699	13.087	9.03	-55.769	1.185	19.518	0.00493
2445	1164.07	178.258	122.998	0.967	4738.23	2124.02	1255.32	-0.32	32.152	22.185	24.299	16.766	-13.137	1.323	37.833	0.00955
1782	848.41	155.965	107.616	0.921	1559.36	3800.59	1258.59	-0.65	30.276	20.89	18.823	12.988	-60.382	1.608	31.197	0.00787
1903	906.018	160.503	110.747	0.928	4830.31	2845.07	1259.24	0.081	30.139	20.796	20.184	13.927	-8.68	1.493	32.73	0.00826
563	268.044	88.966	61.387	0.894	2120.66	1099.95	1261.51	1.062	16.776	11.575	10.903	7.523	-11.396	1.539	17.841	0.0045
290	138.069	61.731	42.594	0.956	3680.31	4400.89	1263.31	1.197	10.34	7.135	9.014	6.22	-3.296	1.147	13.261	0.00335
216	102.838	53.131	36.66	0.962	1559.02	1581.72	1263.33	0.655	8.982	6.198	7.721	5.327	34.798	1.163	11.427	0.00288
1812	862.693	152.268	105.065	0.982	1866.74	1261.78	1266.45	0.897	26.286	18.137	21.992	15.174	41.778	1.195	32.917	0.00831
87	41.421	34.725	23.96	0.907	4573.28	3668.63	1269.38	0.557	6.118	4.221	4.682	3.231	24.516	1.307	7.257	0.00183
391	186.155	73.242	50.537	0.916	2351.13	4415.91	1270.8	-1.204	13.084	9.028	9.643	6.654	-64.966	1.357	15.15	0.00382
1493	710.817	137.75	95.048	0.989	4708.94	3417.85	1272.67	0.402	22.898	15.8	20.796	14.349	-24.401	1.101	30.044	0.00758
1251	595.601	127.254	87.805	0.971	1569.24	1534.45	1277.95	0.678	21.756	15.012	18.469	12.744	82.924	1.178	27.479	0.00694
1800	856.98	152.823	105.448	0.969	2161.89	1047.78	1279.8	1.095	25.814	17.812	22.416	15.467	-86.806	1.152	33.032	0.00834
1239	589.888	129.61	89.431	0.927	1491.65	3760.41	1279.99	-0.611	23.787	16.413	16.681	11.51	-27.021	1.426	26.654	0.00673
2677	1274.52	188.984	130.399	0.942	2304.7	4412.79	1280.64	-1.18	34.034	23.483	25.137	17.345	-56.714	1.354	39.462	0.00996
477	227.1	80.041	55.228	0.936	2118.05	1065.41	1283.24	1.07	14.86	10.253	10.256	7.077	70.913	1.449	16.474	0.00416
465	221.387	77.59	53.537	0.971	3433.88	4508.34	1283.65	1.342	13	8.97	11.465	7.911	19.975	1.134	16.782	0.00424
1917	912.684	160.543	110.775	0.935	1501.95	1608.39	1283.94	0.625	29.443	20.316	20.772	14.333	28.379	1.417	33.126	0.00836
785	373.739	100.573	69.395	0.975	1338.93	3513.06	1284.15	-0.454	17.433	12.029	14.434	9.959	80.297	1.208	21.697	0.00548
1495	711.77	142.462	98.299	0.926	4574.77	3708.82	1285.11	0.575	26.464	18.26	18.027	12.439	54.102	1.468	29.077	0.00734
2189	1042.18	167.112	115.307	0.985	2080.03	4311.21	1286.14	-1.048	28.51	19.672	24.506	16.909	83.006	1.163	36.269	0.00915
2262	1076.94	169.142	116.708	0.994	3658.06	4444.88	1286.21	1.217	27.728	19.132	26.056	17.979	-62.668	1.064	37.057	0.00935
423	201.39	77.034	53.153	0.896	3699.69	4429.02	1286.27	1.193	15.297	10.555	8.927	6.16	67.533	1.714	15.048	0.0038
574	273.281	85.404	58.929	0.989	3979.02	1103.21	1286.29	-1.025	14.887	10.272	12.303	8.489	-38.617	1.21	18.508	0.00467
2336	1112.17	177.378	122.391	0.933	2385.7	4453.92	1287.12	-1.229	33.855	23.36	22.011	15.188	-54.375	1.538	36.015	0.00909
132	62.845	43.65	30.119	0.871	4743.7	3403.02	1290.88	0.387	7.346	5.069	5.825	4.019	76.328	1.261	8.907	0.00225
286	136.165	65.523	45.211	0.837	2046.71	4300.6	1291.5	-1.029	13.359	9.218	6.877	4.745	-81.53	1.942	11.933	0.00301
33	15.711	24.554	16.942	0.688	4738.74	3418.17	1291.7	0.396	5.535	3.819	2.034	1.403	81.581	2.722	3.725	0.00094
231	109.979	55.812	38.51	0.932	4093.01	4225.79	1292.42	0.955	9.148	6.312	8.106	5.593	-72.286	1.128	11.84	0.00299
1779	846.982	152.689	105.355	0.959	3733.18	967.323	1292.97	-1.175	26.833	18.515	21.226	14.646	-64.02	1.264	32.489	0.0082
2239	1065.99	172.8	119.232	0.942	3735.58	4426.05	1293.73	1.174	32.543	22.455	21.968	15.158	65.403	1.481	35.535	0.00897
2187	1041.23	167.667	115.69	0.978	3943.81	1067.47	1295.2	-1.051	28.773	19.853	24.289	16.759	59.627	1.185	36.221	0.00914
2073	986.955	163.319	112.69	0.977	3664.57	934.562	1296.65	-1.216	28.044	19.35	23.598	16.283	87.987	1.188	35.239	0.00889
1707	812.703	147.04	101.458	0.992	4028.22	1111.9	1299.19	-1	23.846	16.454	22.901	15.802	-58.141	1.041	32.236	0.00814
55	26.186	29.917	20.643	0.772	4750.97	3418.79	1299.66	0.393	6.295	4.344	2.87	1.98	-82.678	2.193	5.096	0.00129
1451	690.821	144.684	99.832	0.871	4624.41	3671.36	1300.44	0.544	29.055	20.048	15.922	10.986	28.621	1.825	27.25	0.00688
1906	907.447	158.282	109.215	0.956	2076.55	1059.48	1300.79	1.052	28.771	19.852	21.155	14.597	79.891	1.36	33.263	0.0084
1900	904.59	156.06	107.681	0.98	3403.33	4543.64	1302.85	1.362	25.878	17.856	23.504	16.218	-75.613	1.101	33.956	0.00857
434	206.627	75.464	52.07	0.958	4409.67	3973.07	1306.39	0.74	12.873	8.882	10.783	7.44	-4.243	1.194	16.132	0.00407
605	288.041	91.878	63.396	0.901	3446.98	4539.79	1306.85	1.339	18.045	12.451	10.714	7.393	61.118	1.684	17.98	0.00454
1674	796.991	148.341	102.355	0.956	2007.56	4304.02	1307.63	-1.013	25.524	17.612	21.11	14.566	19.154	1.209	31.748	0.00801
889	423.253	111.069	76.638	0.906	1669.49	4035.13	1307.78	-0.784	20.834	14.375	13.729	9.473	22.617	1.517	22.373	0.00565
2463	1172.63	182.511	125.933	0.929	3492.69	4529.81	1307.79	1.314	32.603	22.496	24.111	16.637	74.262	1.352	37.834	0.00955
109	51.895	38.287	26.418	0.934	2043.6	4326.28	1307.81	-1.035	6.591	4.548	5.381	3.713	80.927	1.225	8.135	0.00205
324	154.256	67.094	46.295	0.904	4103.21	4246.38	1308.09	0.957	11.194	7.724	9.283	6.405	78.727	1.206	13.945	0.00352
1571	747.953	142.002	97.981	0.979	1328.36	3575.36	1310.04	-0.481	23.665	16.329	21.193	14.623	-78.127	1.117	30.811	0.00778
1564	744.62	142.423	98.272	0.969	4441.91	3947.94	1311.42	0.719	24.441	16.864	20.527	14.164	-2.673	1.191	30.677	0.00774
1723	820.32	149.817	103.374	0.965	3528.86	866.98	1311.96	-1.295	26.555	18.323	20.739	14.31	48.47	1.28	31.899	0.00805
2147	1022.19	169.238	116.774	0.942	1283.71	3503.99	1315.83	-0.437	29.365	20.262	23.451	16.181	-13.02	1.252	35.762	0.00903
1133	539.421	122.811	84.74	0.944	1110.52	2918.92	1320.52	-0.116	22.602	15.595	16.026	11.058	-20.018	1.41	25.514	0.00644
237	112.836	55.812	38.51	0.956	4114.97	4263.34	1322.33	0.957	9.281	6.404	8.184	5.647	-72.359	1.134	11.98	0.00302
1829	870.787	155.735	107.457	0.948	4143.96	4243.24	1322.73	0.939	29.186	20.138	19.987	13.791	56.643	1.46	32.183	0.00812
1679	799.372	146.905	101.364	0.978	4784.79	3427.03	1323.4	0.391	25.104	17.322	21.33	14.718	67.655	1.177	31.724	0.00801
1566	745.573	144.453	99.673	0.943	1108.85	2448.77	1323.83	0.13	26.248	18.111	19.194	13.244	-37.62	1.368	30.237	0.00763
2085	992.669	166.786	115.082	0.942	4087.4	4285.88	1324.31	0.976	30.551	21.08	21.806	15.046	66.588	1.401	34.638	0.00874
2261	1076.46	174.926	120.699	0.929	1695.18	4095.23	1325.18	-0.816	32.284	22.276	22.418	15.468	-61.245	1.44	35.936	0.00907
108	51.419	38.517	26.577	0.915	2704.38	4595.08	1326.97	-1.41	6.775	4.675	5.165	3.564	52.528	1.312	8.017	0.00202
1189	566.083	126.468	87.263	0.934	1694.08	1291.84	1328.78	0.818	23.355	16.115	16.294	11.243	-56.209	1.433	26.08	0.00658
237	112.836	60.85	41.987	0.804	3549.18	847.428	1328.79	-1.288	10.766	7.429	7.149	4.933	36.487	1.506	11.623	0.00293
705	335.651	95.67	66.012	0.968	1655.53	4065.39	1329.37	-0.79	16.396	11.313	13.822	9.537	79.68	1.186	20.624	0.00521
79	37.612	32.599	22.493	0.934	1104.9	2409.34	1330.31	0.15	6.024	4.157	4.26	2.939	81.851	1.414	6.788	0.00171
846	402.781	108.943	75.171	0.896	1088.89	2854.23	1330.96	-0.082	20.62	14.228	13.14	9.067	-14.792	1.569	21.627	0.00546
376	179.014	68.99	47.603	0.993	3949.41	4385.61	1333.1	1.064	12.195	8.415	9.874	6.813	-44.384	1.235	14.977	0.00378
1238	589.412	126.373	87.197	0.974	3119.51	767.537	1333.14	-1.515	21.434	14.789	18.501	12.766	26.584	1.159	27.333	0.0069
201	95.696	52.02	35.894	0.933	4387.04	1339.4	1333.41	-0.779	9.46	6.527	6.847	4.724	-63.071	1.382	10.824	0.00273
1453	691.773	137.75	95.048	0.962	2662.92	4601.54	1336.22	-1.39	24.495	16.902	18.943	13.071	-61.487	1.293	29.245	0.00738
93	44.277	38.287	26.418	0.797	2692.43	4606.73	1336.24	-1.405	7.844	5.412	3.896	2.688	-84.346	2.013	6.809	0.00172
2332	1110.27	175.156	120.858	0.955	4423.59	4023.66	1337.16	0.754	31.896	22.008	23.311	16.085	27.342	1.368	36.731	0.00927
60	28.566	32.043	22.11	0.734	2704.18	4611.87	1338.43	-1.412	6.845	4.723	3.013	2.079	-46.161	2.272	5.382	0.00136
386	183.775	72.227	49.837	0.93	3523.87	824.666	1339.16	-1.304	13.656	9.423	9.043	6.24	-13.412	1.51	14.715	0.00371
1520	723.672	139.32	96.131	0.984	4362.61	1302.92	1339.41	-0.801	23.578	16.269	20.587	14.205	-45.516	1.145	30.265	0.00764
274	130.451	59.835	41.286	0.962	1062.24	2672.19	1345	0.013	10.058	6.94	8.772	6.053	25.349	1.147	12.902	0.00326
1613	767.949	147.69	101.906	0.929	1632.56	1312.27	1348.14	0.787	27.141	18.727	18.967	13.087	25.848	1.431	30.341	0.00766
842	400.876	107.737	74.339	0.912	2719.46	4628.89	1348.41	-1.421	20.583	14.202	13.092	9.033	-60.927	1.572	21.558	0.00544
1311	624.167	129.15	89.114	0.988	4426.68	1348.02	1348.91	-0.761	20.753	14.32	20.194	13.934	74.709	1.028	28.246	0.00713
462	219.958	77.59	53.537	0.964	3964.15	4406.11	1350.4	1.062	12.453	8.593	11.859	8.183	-54.028	1.05	16.761	0.00423
701	333.746	97.011	66.938	0.936	1666.5	1273.86	1350.86	0.814	17.758	12.253	12.634	8.717	-55.773	1.406	20.09	0.00507
2352	1119.79	176.822	122.007	0.945	1608.26	4062.64	1351.2	-0.772	33.035	22.794	22.69	15.656	-56.065	1.456	36.501	0.00921
535	254.714	84.064	58.004	0.951	1131.8	3251.68	1352.28	-0.287	15.744	10.863	10.875	7.504	74.766	1.448	17.463	0.00441
1634	777.947	150.047	103.532	0.912	1070.53	2406.61	1354.04	0.148	28.783	19.86	18.096	12.486	-32.434	1.591	29.898	0.00755
477	227.1	79.391	54.78	0.951	3137.3	738.248	1354.05	-1.507	15.328	10.576	9.983	6.888	37.761	1.535	16.325	0.00412
2693	1282.14	187.874	129.633	0.959	3927.79	4434.45	1355.63	1.086	32.606	22.498	26.391	18.21	74.968	1.236	40.035	0.01011
124	59.036	40.413	27.885	0.954	2457.89	4582.46	1356.13	-1.285	7.616	5.255	5.257	3.627	-32.002	1.449	8.443	0.00213
524	249.476	81.937	56.537	0.981	1128.1	2131.32	1356.73	0.292	13.648	9.417	12.35	8.522	47.165	1.105	17.872	0.00451
1379	656.542	136.179	93.964	0.934	1041.62	2714.41	1359.18	-0.009	25.418	17.538	17.306	11.941	-20.214	1.469	27.918	0.00705
995	473.72	113.195	78.105	0.976	3067.68	727.439	1359.27	-1.542	18.945	13.072	16.826	11.61	15.581	1.126	24.552	0.0062
1966	936.013	165.12	113.933	0.906	4003.84	4403.26	1362.25	1.044	30.725	21.2	20.512	14.153	30.707	1.498	33.293	0.0084
109	51.895	37.502	25.876	0.974	1037.16	2671.76	1362.31	0.013	6.359	4.388	5.564	3.839	-59.66	1.143	8.172	0.00206
1531	728.909	146.445	101.047	0.897	1124.9	2088.22	1367.67	0.312	28.06	19.361	17.465	12.051	19.12	1.607	28.938	0.0073
1533	729.861	140.987	97.281	0.969	2491.33	4613.12	1370.22	-1.306	25.239	17.415	19.363	13.36	-80.406	1.303	29.982	0.00757
1738	827.462	150.792	104.046	0.961	1089.56	3200.71	1370.91	-0.257	26.367	18.193	21.091	14.553	14.558	1.25	32.143	0.00811
1465	697.487	139.225	96.065	0.95	1098.36	2153.9	1372.06	0.276	25.399	17.525	18.4	12.696	32.835	1.38	29.08	0.00734
85	40.469	35.606	24.568	0.843	2459.36	4606.99	1372.1	-1.29	7.437	5.132	3.709	2.559	-83.583	2.005	6.477	0.00163
701	333.746	97.336	67.162	0.93	1098.07	3252.04	1374.68	-0.283	17.1	11.799	13.196	9.105	8.61	1.296	20.388	0.00515
1808	860.789	153.513	105.924	0.964	1678.88	1215.36	1374.74	0.838	26.629	18.374	21.715	14.983	36.51	1.226	32.843	0.00829
226	107.599	54.472	37.586	0.957	4609.51	1505.01	1375.5	-0.641	8.939	6.168	8.123	5.605	42.066	1.101	11.733	0.00296
1366	650.353	135.068	93.197	0.941	1015.21	2644.8	1377.81	0.026	24.592	16.968	17.749	12.247	3.707	1.386	28.088	0.00709
138	65.702	41.754	28.81	0.995	2549.54	750.13	1380.34	1.338	6.976	4.813	6.377	4.4	20.074	1.094	9.185	0.00232
2566	1221.67	183.526	126.633	0.957	4784.72	1767.53	1381.37	-0.483	32.613	22.503	25.099	17.318	-11.858	1.299	38.818	0.0098
1701	809.846	147.92	102.065	0.977	4648.28	1543.21	1381.69	-0.614	25.486	17.585	21.327	14.716	-31.321	1.195	31.921	0.00806
1837	874.596	154.164	106.373	0.971	2426.41	4616.65	1384.96	-1.275	26.612	18.362	22.088	15.241	-81.8	1.205	33.17	0.00837
85	40.469	32.924	22.718	0.985	1763.37	4271.38	1386.45	-0.901	5.78	3.988	4.755	3.281	17.771	1.216	7.166	0.00181
182	86.65	49.339	34.044	0.94	3242.26	4696.75	1389.28	1.456	9.152	6.315	6.388	4.408	-88.302	1.433	10.223	0.00258
1614	768.425	142.787	98.523	0.995	2293.02	815.628	1389.29	1.206	23.981	16.547	21.457	14.805	74.389	1.118	31.207	0.00788
1269	604.171	128.269	88.506	0.969	2575.29	728.981	1390.59	1.353	22.11	15.256	18.39	12.689	83.106	1.202	27.593	0.00696
213	101.409	51.79	35.735	0.998	2258.15	826.739	1390.94	1.188	8.767	6.049	7.805	5.385	40.815	1.123	11.376	0.00287
123	58.56	41.524	28.652	0.896	3896.93	884.703	1391.54	-1.116	7.58	5.23	5.299	3.656	88.272	1.43	8.475	0.00214
1427	679.395	136.869	94.44	0.957	3930.26	898.036	1393.59	-1.098	24.98	17.236	18.337	12.653	-72.505	1.362	28.849	0.00728
1481	705.104	141.542	97.664	0.929	1078.26	3289.62	1395.19	-0.298	26.445	18.247	17.918	12.363	10.401	1.476	28.949	0.00731
121	57.608	39.073	26.96	0.996	4962	3233.7	1396.03	0.269	6.408	4.422	6.105	4.212	-25.894	1.05	8.626	0.00218
1499	713.674	141.542	97.664	0.94	3208.2	4712.24	1397.41	1.473	26.03	17.961	18.371	12.676	-83.317	1.417	29.293	0.00739
462	219.958	77.59	53.537	0.964	3378.16	703.396	1398.4	-1.389	13.33	9.198	11.079	7.645	-6.099	1.203	16.629	0.0042
298	141.878	63.627	43.903	0.925	1751.97	4287.75	1400.18	-0.901	11.892	8.205	8.186	5.648	-59.321	1.453	13.159	0.00332
1367	650.829	132.521	91.439	0.978	5040.76	2693.39	1400.28	-0.002	22.587	15.585	19.313	13.326	11.963	1.17	28.647	0.00723
1452	691.297	138.305	95.43	0.954	4850.41	1836.32	1400.91	-0.438	25.215	17.398	18.365	12.672	-6.085	1.373	28.972	0.00731
1263	601.314	126.698	87.422	0.989	1781.12	4313.18	1401.71	-0.92	21.259	14.669	18.983	13.098	-86.619	1.12	27.634	0.00698
1510	718.911	139.09	95.972	0.981	4631.83	1469.99	1402.32	-0.648	24.784	17.101	19.436	13.411	-24.119	1.275	29.848	0.00753
52	24.757	27.791	19.176	0.846	3243.04	4717.79	1403.76	1.457	5.593	3.859	3.058	2.11	81.87	1.829	5.236	0.00132
1193	567.987	124.247	85.73	0.971	3273.87	4716.62	1405.54	1.442	22.44	15.484	16.956	11.7	66.206	1.323	26.403	0.00666
292	139.021	61.731	42.594	0.963	4161.88	1014.91	1405.93	-0.971	9.919	6.844	9.449	6.52	32.454	1.05	13.352	0.00337
1449	689.869	137.654	94.981	0.961	2514.39	719.272	1406.78	1.325	23.348	16.11	19.86	13.703	-89.252	1.176	29.523	0.00745
339	161.398	67.649	46.678	0.931	4976.8	3253.02	1409.45	0.276	12.488	8.617	8.713	6.012	2.711	1.433	13.946	0.00352
1722	819.844	148.706	102.607	0.979	3428.63	692.387	1412.55	-1.366	25.718	17.745	21.361	14.739	-76.256	1.204	32.069	0.00809
118	56.18	40.969	28.269	0.883	3234.44	4732.52	1413.2	1.462	7.852	5.418	4.935	3.405	-85.091	1.591	8.154	0.00206
168	79.985	47.442	32.735	0.938	3395.22	684.708	1413.24	-1.382	7.928	5.47	6.813	4.701	-86.656	1.164	10.084	0.00255
1621	771.758	146.905	101.364	0.944	2220.03	805.071	1414.76	1.175	26.189	18.07	19.986	13.79	59.861	1.31	31.007	0.00783
1467	698.439	138.765	95.748	0.957	1713.31	4286.17	1416.05	-0.886	25.243	17.418	18.531	12.786	-46.384	1.362	29.153	0.00736
98	46.658	35.606	24.568	0.971	1942.65	943.541	1416.66	1.023	6.516	4.496	4.893	3.376	-24.393	1.332	7.636	0.00193
581	276.614	88.871	61.321	0.924	1204.36	1719.78	1417.34	0.496	15.603	10.766	11.923	8.227	-34.085	1.309	18.489	0.00467
1516	721.768	140.106	96.673	0.971	5066.06	2636.1	1418.36	-0.029	25.024	17.267	19.413	13.395	18.529	1.289	29.935	0.00756
1408	670.349	136.964	94.505	0.943	3897.44	841.573	1418.49	-1.125	24.844	17.142	18.096	12.486	87.514	1.373	28.546	0.00721
1404	668.444	135.068	93.197	0.967	5060.8	2880.7	1419.8	0.09	22.409	15.462	20.064	13.844	7.579	1.117	29.172	0.00736
1879	894.592	156.06	107.681	0.97	4982.98	3292.88	1421.27	0.294	27.188	18.76	22.093	15.244	31.738	1.231	33.462	0.00845
1520	723.672	138.765	95.748	0.992	1972.69	916.359	1422.15	1.043	23.599	16.283	20.556	14.184	-81.907	1.148	30.251	0.00764
1260	599.886	127.484	87.964	0.974	4207.06	1016.6	1422.82	-0.952	23.122	15.954	17.374	11.988	11.425	1.331	27.107	0.00684
1851	881.261	152.823	105.448	0.996	5005.92	3220.92	1423.01	0.257	25.378	17.511	23.291	16.071	-77.068	1.09	33.489	0.00845
1802	857.932	151.943	104.841	0.981	3362.66	663.33	1423.74	-1.4	24.966	17.227	23.028	15.889	-57.484	1.084	33.035	0.00834
189	89.983	51.465	35.511	0.897	1089.61	3448.21	1423.83	-0.373	9.316	6.428	6.534	4.508	51.529	1.426	10.439	0.00263
1471	700.343	138.075	95.272	0.97	4148.93	971.57	1425.78	-0.988	23.836	16.447	19.828	13.681	0.931	1.202	29.749	0.00751
1183	563.226	128.594	88.73	0.899	969.951	3024	1426.58	-0.159	24.754	17.08	15.27	10.536	7.765	1.621	25.363	0.0064
133	63.321	45.316	31.268	0.814	4343.56	1114.41	1427.16	-0.871	8.732	6.025	4.994	3.446	76.932	1.748	8.461	0.00214
159	75.7	48.228	33.277	0.859	1940.46	921.362	1430.53	1.028	9.547	6.587	5.382	3.714	-86.631	1.774	9.15	0.00231
219	104.266	52.575	36.277	0.996	1436.94	4045.72	1430.64	-0.708	8.893	6.136	7.913	5.46	-39.418	1.124	11.537	0.00291
948	451.343	113.751	78.488	0.921	970.318	3080.99	1433.08	-0.186	21.67	14.952	13.976	9.643	-16.209	1.551	22.921	0.00579
1637	779.376	146.35	100.982	0.96	1408.59	4017.98	1433.3	-0.689	25.978	17.925	20.206	13.942	-35.635	1.286	31.127	0.00786
443	210.912	76.574	52.836	0.949	1183.47	1706.63	1434.34	0.496	13.67	9.432	10.357	7.146	-36.57	1.32	16.11	0.00407
353	168.063	68.204	47.061	0.954	1067.81	3447.91	1437.77	-0.369	11.907	8.216	9.51	6.562	66.202	1.252	14.502	0.00366
912	434.203	109.403	75.488	0.958	1189.63	3713.27	1439.5	-0.509	19.037	13.136	15.309	10.563	69.185	1.244	23.283	0.00588
530	252.333	83.278	57.462	0.96	4357.67	1098.73	1441.7	-0.871	13.454	9.283	12.61	8.701	-77.444	1.067	17.956	0.00453
260	123.786	58.494	40.361	0.955	5072.84	3045.3	1442.62	0.168	10.493	7.24	7.948	5.484	-85.892	1.32	12.364	0.00312
972	462.769	112.085	77.339	0.972	1078.17	3506.39	1446.21	-0.397	19.926	13.749	15.566	10.741	-39.243	1.28	23.941	0.00604
1236	588.46	127.484	87.964	0.956	1906.56	913.729	1447.22	1.016	23.633	16.307	16.673	11.504	-72.062	1.417	26.588	0.00671
106	50.467	37.176	25.651	0.964	1949.05	4505.48	1447.45	-1.04	6.034	4.163	5.667	3.91	40.367	1.065	8.061	0.00203
141	67.13	43.65	30.119	0.93	1413.36	4056.09	1447.66	-0.705	8.095	5.586	5.619	3.877	-31.187	1.441	9.009	0.00227
92	43.801	35.05	24.185	0.941	1281.61	3887.49	1449.05	-0.603	6.223	4.294	4.874	3.363	-7.729	1.277	7.489	0.00189
1117	531.804	120.78	83.338	0.962	1303.22	3920.44	1449.91	-0.622	20.937	14.447	17.063	11.773	-76.225	1.227	25.813	0.00652
1527	727.005	141.447	97.598	0.959	1186.19	1653.79	1450.42	0.519	24.629	16.994	19.795	13.659	55.465	1.244	30.112	0.0076
232	110.455	56.598	39.053	0.91	1165.29	1690.38	1450.72	0.499	11.121	7.673	6.713	4.632	45.771	1.657	11.216	0.00283
867	412.779	108.388	74.788	0.927	917.009	2881.66	1450.74	-0.088	20.659	14.255	13.398	9.245	-20.71	1.542	21.939	0.00554
291	138.545	60.945	42.052	0.985	5099.81	2939.55	1450.74	0.116	10.573	7.295	8.821	6.086	-8.738	1.199	13.218	0.00334
1822	867.454	153.609	105.99	0.97	1429.18	4087.09	1453.4	-0.721	27.303	18.839	21.339	14.724	-21.722	1.279	32.813	0.00828
84	39.992	35.28	24.343	0.848	1281.63	3900.82	1454.27	-0.608	6.909	4.767	4.021	2.774	-52.374	1.718	6.781	0.00171
852	405.637	107.602	74.245	0.925	4852.03	1659.58	1457.76	-0.513	20.835	14.376	13.065	9.015	-5.672	1.595	21.602	0.00545
106	50.467	37.176	25.651	0.964	5096.35	3047.56	1458.88	0.167	6.061	4.182	5.688	3.925	72.108	1.065	8.095	0.00204
2171	1033.61	171.134	118.082	0.932	1190.9	3772.58	1459.12	-0.534	31.957	22.05	21.718	14.985	-52.499	1.471	35.055	0.00885
742	353.266	98.907	68.246	0.953	901.608	2840.77	1459.13	-0.068	17.548	12.108	13.493	9.31	4.383	1.301	20.875	0.00527
180	85.698	47.998	33.119	0.982	4353.71	4330.83	1459.25	0.883	8.19	5.651	7.046	4.862	89.644	1.162	10.424	0.00263
454	216.149	76.019	52.453	0.987	1166.62	3735.03	1460.69	-0.513	12.82	8.846	11.332	7.819	-85.867	1.131	16.57	0.00418
1601	762.236	142.787	98.523	0.987	1752.58	993.052	1461.53	0.934	24.432	16.858	20.92	14.435	41.195	1.168	31.013	0.00783
834	397.067	104.27	71.946	0.964	4838.62	1625.02	1461.61	-0.53	18.083	12.477	14.734	10.166	-20.463	1.227	22.291	0.00563
1970	937.917	158.972	109.691	0.98	3643.36	4723.79	1465.17	1.269	27.106	18.703	23.368	16.124	-69.943	1.16	34.541	0.00872
2153	1025.04	167.667	115.69	0.962	1136.96	3698.55	1466.52	-0.491	29.084	20.068	23.726	16.371	-58.991	1.226	35.88	0.00906
1595	759.38	141.772	97.823	0.997	4544.51	1224.03	1466.79	-0.765	23.102	15.94	22.001	15.181	81.272	1.05	31.093	0.00785
1228	584.651	129.935	89.655	0.914	1958.48	4543.46	1466.87	-1.053	24.839	17.139	15.792	10.896	-73.559	1.573	26.008	0.00656
974	463.721	113.425	78.263	0.951	1917.71	4519.85	1467.02	-1.03	21.046	14.522	14.766	10.189	-55.183	1.425	23.591	0.00595
200	95.22	51.465	35.511	0.949	4422.62	1106.11	1467.17	-0.845	9.395	6.483	6.83	4.713	-24.719	1.376	10.782	0.00272
173	82.365	47.442	32.735	0.966	1719.88	1006.99	1467.39	0.918	8.182	5.646	6.778	4.677	86.169	1.207	10.187	0.00257
1373	653.685	132.617	91.506	0.981	1451.62	1249.03	1468.3	0.748	21.793	15.037	20.157	13.908	78.847	1.081	28.879	0.00729
1277	607.98	128.364	88.571	0.974	1020.16	3450.03	1468.99	-0.362	21.377	14.75	19.156	13.218	-84.299	1.116	27.842	0.00703
1722	819.844	150.372	103.757	0.957	4361.41	1050.33	1469.04	-0.884	26.675	18.406	20.638	14.24	-56.8	1.292	31.856	0.00804
1196	569.416	125.358	86.497	0.956	2417.46	651.839	1469.19	1.288	21.834	15.065	17.501	12.076	62.865	1.248	26.651	0.00673
1312	624.643	136.964	94.505	0.879	883.787	2601.95	1469.48	0.044	27.022	18.645	15.599	10.763	-17.25	1.732	26.365	0.00665
1733	825.081	150.602	103.915	0.96	1125.17	1707.68	1469.5	0.483	26.703	18.425	20.819	14.365	27.335	1.283	32.043	0.00809
255	121.406	57.153	39.436	0.981	5060.72	2107.9	1471.24	-0.28	9.397	6.484	8.685	5.993	-47.448	1.082	12.448	0.00314
1312	624.643	133.402	92.047	0.926	3706.56	4714.29	1472.53	1.239	24.899	17.18	16.812	11.6	75.653	1.481	27.192	0.00686
1699	808.894	148.801	102.673	0.964	4508.15	4218.78	1473.02	0.794	27.835	19.206	19.465	13.431	55.284	1.43	31.132	0.00786
1235	587.984	130.491	90.039	0.911	876.493	2667.76	1473.19	0.014	24.501	16.906	16.101	11.11	-0.106	1.522	26.261	0.00663
990	471.339	115.092	79.413	0.939	1249.32	3904.43	1474.04	-0.601	20.882	14.409	15.172	10.469	-55.757	1.376	23.955	0.00605
430	204.723	76.249	52.612	0.929	4858.53	3771.24	1474.55	0.527	13.898	9.59	9.93	6.852	38.181	1.4	15.769	0.00398
1304	620.834	135.068	93.197	0.898	4344.07	4372.1	1477.22	0.899	26.168	18.056	15.896	10.968	70.636	1.646	26.514	0.00669
392	186.631	71.441	49.294	0.965	5146.82	2522.68	1478.34	-0.081	12.058	8.32	10.437	7.202	79.526	1.155	15.402	0.00389
1502	715.102	138.86	95.813	0.979	4392.74	4338.88	1480.74	0.871	24.351	16.802	19.693	13.588	68.583	1.237	29.883	0.00754
1839	875.548	153.704	106.056	0.978	4842.76	3817.41	1481.53	0.549	25.163	17.362	23.445	16.177	-85.825	1.073	33.476	0.00845
1602	762.712	151.578	104.589	0.876	5134.64	3017.68	1481.72	0.15	29.224	20.165	17.676	12.196	-5.537	1.653	29.517	0.00745
1144	544.658	122.446	84.488	0.959	5146.3	2929.64	1481.86	0.109	22.165	15.294	16.506	11.389	5.131	1.343	25.836	0.00652
1813	863.169	154.489	106.597	0.955	5086.33	2141.69	1482.04	-0.261	27.433	18.929	21.122	14.574	6.714	1.299	32.662	0.00824
2188	1041.71	169.008	116.616	0.963	5123.15	3089.15	1482.09	0.184	30.304	20.91	23.1	15.939	-16.761	1.312	35.854	0.00905
1387	660.351	132.847	91.664	0.988	1389.02	1287.59	1482.66	0.715	21.869	15.09	20.249	13.972	41.019	1.08	28.998	0.00732
1474	701.771	137.52	94.889	0.979	1684.97	1004.19	1483.66	0.906	24.36	16.808	19.347	13.349	65.02	1.259	29.566	0.00746
892	424.681	110.744	76.413	0.914	1828.99	898.759	1484.74	0.989	21.581	14.891	13.197	9.106	-60.188	1.635	21.973	0.00555
439	209.008	75.234	51.911	0.975	3038.21	4851.14	1486.76	1.558	12.829	8.852	10.946	7.553	-71.204	1.172	16.251	0.0041
47	22.377	25.014	17.26	0.944	865.628	2905.71	1487.57	-0.097	4.303	2.969	3.59	2.477	-35.573	1.199	5.38	0.00136
740	352.314	103.159	71.18	0.874	2361.77	639.059	1488.77	1.265	20.226	13.956	11.676	8.056	70.19	1.732	19.734	0.00498
780	371.358	100.248	69.171	0.975	927.26	3261.85	1489.99	-0.265	17.843	12.312	13.954	9.628	0.19	1.279	21.452	0.00541
1339	637.498	133.402	92.047	0.946	4567.54	4194.34	1490.29	0.766	23.123	15.955	18.769	12.951	60.687	1.232	28.441	0.00718
1575	749.858	144.453	99.673	0.948	4894.84	3755.76	1491	0.512	26.819	18.505	18.752	12.939	28.099	1.43	29.992	0.00757
183	87.126	50.449	34.81	0.904	2407.54	619.719	1492.38	1.288	9.426	6.504	6.407	4.421	30.956	1.471	10.342	0.00261
1414	673.205	136.869	94.44	0.949	5081.3	2068.99	1492.46	-0.294	25.108	17.325	17.962	12.394	-39.298	1.398	28.511	0.0072
193	91.887	50.124	34.586	0.965	5169.88	2511.38	1494.85	-0.086	8.328	5.746	7.466	5.152	-84.446	1.116	10.85	0.00274
235	111.884	55.257	38.127	0.967	4998.69	3566.72	1496.93	0.413	9.671	6.673	7.831	5.403	-13.231	1.235	11.877	0.003
1417	674.634	135.068	93.197	0.976	2985.48	4866.1	1497.07	-1.559	22.799	15.731	19.832	13.684	76.443	1.15	29.202	0.00737
917	436.584	108.292	74.721	0.983	929.931	3321.65	1499.55	-0.292	17.443	12.036	16.789	11.584	-43.478	1.039	23.607	0.00596
1668	794.135	152.038	104.906	0.907	5173.59	2473.54	1499.85	-0.103	28.662	19.777	18.715	12.913	-9.598	1.531	30.582	0.00772
227	108.075	53.916	37.202	0.981	3627.91	610.359	1501.05	-1.283	9.312	6.425	7.862	5.425	-13.64	1.184	11.724	0.00296
178	84.746	47.672	32.894	0.984	3023.11	4876.53	1504.18	1.565	7.866	5.428	7.288	5.029	74.574	1.079	10.434	0.00263
1526	726.529	140.526	96.963	0.971	5187.07	2550.3	1504.63	-0.067	24.819	17.125	19.663	13.567	-21.199	1.262	30.078	0.00759
28	13.331	18.866	13.018	0.989	840.893	2910.86	1504.9	-0.098	3.376	2.329	2.725	1.88	-34.188	1.239	4.138	0.00104
1501	714.626	144.818	99.924	0.899	1771.35	4492.69	1505.97	-0.967	26.184	18.067	18.569	12.813	-69.363	1.41	29.561	0.00746
801	381.356	106.952	73.797	0.88	1745.44	4475.12	1506.31	-0.952	17.859	12.323	14.775	10.195	-74.782	1.209	22.218	0.00561
119	56.656	38.843	26.802	0.991	869.937	2258.14	1508.24	0.202	6.472	4.466	5.925	4.088	-36.366	1.092	8.529	0.00215
131	62.369	42.309	29.193	0.92	2135.44	4700.67	1509.12	-1.159	7.868	5.429	5.364	3.701	80.739	1.467	8.649	0.00218
997	474.672	113.521	78.329	0.972	4232.87	4515.32	1511.69	0.979	19.219	13.261	16.559	11.426	58.349	1.161	24.483	0.00618
143	68.082	44.436	30.661	0.91	5021.47	3576.46	1514.03	0.413	8.715	6.013	5.299	3.656	28.818	1.645	8.836	0.00223
1086	517.045	118.098	81.488	0.978	2887.65	505.834	1514.03	1.514	19.617	13.536	17.666	12.19	-31.761	1.11	25.621	0.00647
297	141.402	61.731	42.594	0.979	5069.78	1935.99	1514.16	-0.354	10.035	6.924	9.482	6.543	-8.818	1.058	13.451	0.0034
807	384.213	103.255	71.246	0.951	824.96	2885.12	1514.22	-0.086	19.129	13.199	13.468	9.293	7.605	1.42	21.492	0.00542
1178	560.846	126.698	87.422	0.922	1790.96	872.447	1514.37	0.981	23.174	15.99	16.296	11.244	-48.796	1.422	26.015	0.00657
450	214.245	76.019	52.453	0.979	832.091	2423.1	1515.49	0.125	13.691	9.447	10.504	7.248	-22.762	1.303	16.265	0.00411
806	383.737	107.047	73.862	0.884	2609.85	536.903	1515.72	1.387	19.536	13.48	13.627	9.403	-82.399	1.434	21.813	0.00551
61	29.042	28.021	19.334	0.976	2605.43	4856.34	1516.32	-1.385	4.764	3.287	4.146	2.861	-48.633	1.149	6.104	0.00154
1567	746.049	148.801	102.673	0.889	3063.12	4894.1	1516.7	1.547	29.477	20.339	16.963	11.704	85.948	1.738	28.692	0.00724
284	135.212	60.39	41.669	0.979	924.468	2005.16	1516.93	0.32	9.829	6.782	9.324	6.434	-85.806	1.054	13.202	0.00333
979	466.102	113.751	78.488	0.951	819.684	2518.93	1517.22	0.081	20.881	14.408	14.976	10.333	10.012	1.394	23.75	0.00599
150	71.415	47.998	33.119	0.818	2122.08	4710.22	1518.87	-1.155	9.425	6.503	5.113	3.528	-84.64	1.843	8.771	0.00221
1400	666.54	134.743	92.973	0.969	3607.75	577.025	1519.29	-1.297	23.461	16.188	19.122	13.194	62.464	1.227	28.927	0.0073
52	24.757	31.028	21.409	0.679	3256.75	507.5	1519.93	-1.459	7.006	4.834	2.486	1.715	-81.664	2.818	4.572	0.00115
326	155.209	77.455	53.444	0.683	1724.1	4485.03	1520.44	-0.947	16.935	11.685	6.222	4.293	-89.787	2.722	11.398	0.00288
1764	839.84	151.483	104.523	0.966	5015.28	3614.02	1520.72	0.429	27.05	18.665	20.796	14.349	46.345	1.301	32.176	0.00812
929	442.297	110.189	76.03	0.962	819.288	2933.31	1521.33	-0.108	20.105	13.872	14.746	10.175	21.306	1.363	23.206	0.00586
1844	877.928	154.164	106.373	0.975	5045.61	3550.54	1522.29	0.397	27.586	19.034	21.38	14.752	17.848	1.29	32.979	0.00832
1217	579.414	126.373	87.197	0.958	2832.3	497.56	1522.35	1.49	22.268	15.365	17.443	12.036	68.708	1.277	26.799	0.00676
99	47.134	41.294	28.493	0.73	3267.25	503.379	1523.58	-1.455	9.121	6.293	3.531	2.436	-89.148	2.583	6.425	0.00162
1272	605.599	127.579	88.03	0.982	3664.26	586.671	1523.95	-1.271	22.684	15.652	17.915	12.361	-84.383	1.266	27.438	0.00693
345	164.255	65.753	45.37	1.003	4754.97	4052.49	1524.05	0.661	11.36	7.838	9.718	6.705	-42.829	1.169	14.411	0.00364
1056	502.762	119.669	82.572	0.927	839.882	2284.4	1525.08	0.188	22.138	15.275	15.24	10.516	-10.973	1.453	24.499	0.00618
1175	559.418	124.477	85.889	0.953	1037.48	3691.78	1525.29	-0.467	22.762	15.706	16.475	11.368	-52.224	1.382	26.047	0.00657
425	202.343	77.915	53.761	0.88	1708.67	4483.9	1526.05	-0.941	15.054	10.387	9.061	6.252	-77.922	1.661	15.151	0.00382
927	441.345	109.173	75.329	0.977	3235.93	495.715	1526.49	-1.469	18.383	12.684	16.12	11.123	59.52	1.14	23.654	0.00597
35	16.664	22.103	15.251	0.9	2589.27	4871.01	1528.36	-1.379	4.536	3.13	2.545	1.756	-79.112	1.782	4.332	0.00109
1128	537.041	120.685	83.273	0.973	3293.95	498.429	1529.21	-1.443	20.72	14.297	17.488	12.067	-52.623	1.185	26.082	0.00658
201	95.696	52.25	36.053	0.925	907.709	1996.37	1529.82	0.321	9.298	6.416	6.985	4.82	-12.752	1.331	10.9	0.00275
36	17.14	22.888	15.793	0.864	2602.03	4875.92	1530.03	-1.385	4.763	3.286	2.484	1.714	-56.016	1.918	4.298	0.00108
928	441.821	110.514	76.255	0.955	796.436	2566.3	1530.94	0.059	18.901	13.042	15.77	10.881	6.897	1.199	23.632	0.00597
1017	484.194	115.877	79.955	0.952	1005.96	3649.84	1532.1	-0.444	19.595	13.521	16.653	11.491	-52.97	1.177	24.766	0.00625
1292	615.121	128.269	88.506	0.987	892.204	2030.73	1532.7	0.304	21.933	15.134	18.79	12.965	-23.513	1.167	27.849	0.00703
1733	825.081	151.713	104.682	0.946	2086.39	4717.06	1533.27	-1.141	27.425	18.923	20.221	13.952	-43.688	1.356	31.762	0.00802
396	188.536	73.337	50.603	0.925	5100.95	1934.52	1534.71	-0.35	11.926	8.229	10.702	7.384	-64.084	1.114	15.545	0.00392
162	77.128	46.102	31.81	0.958	803.469	2426.96	1534.77	0.122	7.833	5.405	6.658	4.594	-3.309	1.176	9.901	0.0025
124	59.036	41.754	28.81	0.894	5237.83	2681.73	1536.3	-0.007	7.807	5.387	5.127	3.538	-70.742	1.523	8.364	0.00211
1822	867.454	153.934	106.214	0.966	2142.41	4747.69	1537.03	-1.17	27.635	19.068	21.026	14.508	-82.105	1.314	32.657	0.00824
1083	515.616	122.121	84.263	0.913	831.328	2237.92	1537.16	0.207	23.29	16.07	14.853	10.249	-14.207	1.568	24.441	0.00617
574	273.281	86.745	59.854	0.959	3071.82	469.617	1537.18	-1.544	15.709	10.839	11.678	8.058	77.515	1.345	18.291	0.00462
448	213.293	76.804	52.995	0.954	4087.14	4651.47	1539.62	1.068	12.904	8.904	11.114	7.669	-65.215	1.161	16.435	0.00415
215	102.362	53.361	36.819	0.949	4768.42	4073.16	1540.13	0.665	9.782	6.75	7.049	4.864	63.29	1.388	11.162	0.00282
1510	718.911	144.549	99.739	0.908	798.472	2391.26	1541.36	0.137	28.257	19.497	17.05	11.765	4.065	1.657	28.491	0.00719
1218	579.89	127.158	87.739	0.947	901.256	1962.34	1541.6	0.335	22.062	15.223	17.74	12.241	21.262	1.244	26.982	0.00681
1397	665.112	135.298	93.356	0.959	1231.83	1343.59	1542.48	0.65	24.413	16.845	18.332	12.649	43.704	1.332	28.609	0.00722
47	22.377	26.68	18.409	0.83	1213.41	1366.37	1543.21	0.637	5.271	3.637	2.951	2.036	68.82	1.786	5.025	0.00127
492	234.241	80.271	55.387	0.96	3040.95	458.146	1544.66	-1.558	14.51	10.012	10.852	7.488	-59.406	1.337	16.96	0.00428
1018	484.67	113.981	78.647	0.985	3487.36	508.308	1545.22	-1.357	18.677	12.887	17.389	11.998	22.053	1.074	24.837	0.00627
1801	857.456	157.076	108.382	0.917	4748.84	4109.69	1545.3	0.683	29.842	20.591	19.302	13.318	60.692	1.546	31.63	0.00798
2504	1192.15	184.637	127.4	0.923	5133.11	1969.09	1547.67	-0.33	34.837	24.038	22.946	15.833	-14.047	1.518	37.399	0.00944
762	362.788	101.129	69.779	0.936	2617.29	4907.81	1549.78	-1.394	18.184	12.547	13.455	9.284	85.869	1.352	21.109	0.00533
294	139.973	62.191	42.912	0.955	954.565	1793.9	1549.86	0.414	11.73	8.094	8.022	5.535	-41.922	1.462	12.923	0.00326
1082	515.14	119.439	82.413	0.953	765.783	2748.4	1549.86	-0.023	21.786	15.032	15.871	10.951	-1.312	1.373	25.035	0.00632
113	53.799	37.732	26.035	0.997	2396.92	4859.69	1551.58	-1.294	6.85	4.727	5.307	3.662	-30.043	1.291	8.188	0.00207
978	465.626	113.751	78.488	0.95	774.334	2454.92	1552.53	0.108	20.771	14.332	15.083	10.407	11.471	1.377	23.818	0.00601
1271	605.123	130.721	90.197	0.935	2564.15	4902.42	1552.98	-1.371	23.561	16.257	17.39	11.999	-49.873	1.355	27.306	0.00689
298	141.878	62.516	43.136	0.958	4108.37	4661.88	1553	1.062	10.129	6.989	9.414	6.496	56.638	1.076	13.458	0.0034
1388	660.827	139.09	95.972	0.902	5265.35	2729.87	1555.42	0.015	26.403	18.218	16.898	11.66	-24.832	1.562	27.777	0.00701
167	79.509	46.332	31.969	0.978	3323.25	4931.45	1556.99	1.432	7.48	5.161	7.165	4.944	37.4	1.044	10.098	0.00255
1692	805.561	148.706	102.607	0.962	1180.3	1377.24	1557.24	0.624	26.539	18.312	20.343	14.037	40.776	1.305	31.51	0.00795
249	118.549	58.494	40.361	0.915	5205.86	3226.99	1557.8	0.237	11.189	7.72	7.148	4.932	9.155	1.565	11.756	0.00297
775	368.978	99.693	68.788	0.98	4100.47	717.695	1558.57	-1.068	17.373	11.987	14.25	9.833	-19.502	1.219	21.503	0.00543
1486	707.485	142.557	98.364	0.919	4804.27	4072.23	1559.29	0.654	26.792	18.486	17.743	12.243	51.029	1.51	28.871	0.00729
1505	716.531	139.876	96.514	0.967	4142.46	4654.64	1560.28	1.047	24.845	17.143	19.417	13.398	39.209	1.28	29.858	0.00754
2439	1161.21	187.414	129.316	0.873	5129.57	1898.31	1561.91	-0.36	37.108	25.605	20.968	14.468	-5.361	1.77	35.628	0.00899
824	392.306	103.255	71.246	0.971	5275.48	2675.89	1562.31	-0.009	17.735	12.237	14.842	10.241	-17.304	1.195	22.213	0.00561
260	123.786	58.169	40.137	0.966	940.023	1776.52	1563.88	0.418	9.993	6.895	8.346	5.759	12.967	1.197	12.502	0.00316
744	354.218	98.352	67.863	0.967	4034.54	673.622	1564.23	-1.103	16.121	11.123	14.841	10.24	18.623	1.086	21.308	0.00538
398	189.488	75.789	52.294	0.871	2702.63	450.452	1564.41	1.434	15.293	10.552	8.362	5.77	-83.854	1.829	14.319	0.00361
401	190.916	70.886	48.911	1.003	784.919	3132.31	1565.39	-0.193	12.159	8.39	10.528	7.264	-13.997	1.155	15.533	0.00392
62	29.518	28.577	19.718	0.954	2399.13	4881.71	1565.8	-1.298	5.262	3.631	3.834	2.645	-73.729	1.373	6.047	0.00153
1708	813.179	148.801	102.673	0.969	5227.39	3189.83	1566.48	0.219	25.972	17.921	20.987	14.481	-3.528	1.238	31.858	0.00804
1471	700.343	137.75	95.048	0.974	950.813	1743.34	1566.55	0.433	23.064	15.914	20.355	14.045	66.272	1.133	29.784	0.00752
860	409.446	107.832	74.404	0.929	806.928	2145.81	1567.82	0.245	19.991	13.794	13.752	9.489	-21.794	1.454	22.112	0.00558
62	29.518	27.791	19.176	1.009	4326.39	838.823	1570.5	-0.955	4.853	3.349	4.151	2.864	26.618	1.169	6.156	0.00155
332	158.065	69.315	47.827	0.868	2723.58	437.765	1571.19	1.444	13.371	9.226	8.008	5.526	-86.545	1.67	13.409	0.00338
760	361.836	100.248	69.171	0.95	3353.07	4947.9	1571.19	1.42	18.024	12.437	13.48	9.301	70.406	1.337	21.067	0.00532
685	326.129	95.9	66.171	0.936	3874.65	588.758	1571.66	-1.182	17.602	12.145	12.49	8.618	-71.49	1.409	19.879	0.00502
216	102.838	53.361	36.819	0.953	4076.09	682.407	1572.02	-1.085	9.671	6.673	7.177	4.952	-81.937	1.348	11.248	0.00284
1065	507.047	117.773	81.263	0.965	1425.73	1059.7	1572.48	0.801	20.983	14.478	16.199	11.177	85.352	1.295	25.024	0.00632
1439	685.108	140.431	96.897	0.917	4101.65	4698.3	1572.77	1.072	26.217	18.09	17.641	12.172	35.554	1.486	28.564	0.00721
223	106.17	54.702	37.744	0.937	4767.84	1242.45	1573.4	-0.692	10.739	7.41	6.651	4.589	-53.739	1.615	11.035	0.00279
1395	664.16	133.957	92.43	0.977	4749.78	1216.76	1575.25	-0.705	23.96	16.532	18.582	12.822	-68.327	1.289	28.657	0.00723
2411	1147.88	175.712	121.241	0.981	5222.38	3266.36	1575.44	0.252	28.165	19.434	27.421	18.92	-31.327	1.027	38.344	0.00968
1135	540.374	121.47	83.814	0.967	3298.87	4961.74	1575.49	1.445	19.578	13.509	18.519	12.778	76.276	1.057	26.257	0.00663
999	475.624	116.432	80.338	0.926	2429.58	4906.44	1576.75	-1.313	21.856	15.081	14.683	10.131	69.928	1.488	23.786	0.006
576	274.234	87.856	60.621	0.938	759.682	3101.96	1578.64	-0.178	15.647	10.796	11.767	8.119	-8.537	1.33	18.353	0.00463
299	142.354	65.293	45.052	0.881	3852.97	568.366	1579.13	-1.194	12.749	8.797	7.595	5.241	-81.597	1.679	12.735	0.00321
574	273.281	91.323	63.013	0.865	2675.51	431.443	1580.04	1.424	17.929	12.371	10.234	7.061	-68.868	1.752	17.345	0.00438
1525	726.053	140.757	97.122	0.967	4795.49	1260.33	1580.38	-0.678	24.854	17.149	19.613	13.533	-31.473	1.267	30.048	0.00758
992	472.291	112.085	77.339	0.992	4558.17	1005.83	1581.18	-0.83	18.238	12.584	17.426	12.024	11.905	1.047	24.589	0.00621
1192	567.511	125.032	86.272	0.958	1380.1	1083.86	1582.78	0.78	21.82	15.056	17.422	12.021	78.794	1.252	26.57	0.00671
225	107.123	53.591	36.978	0.984	4331.71	817.624	1584.57	-0.958	8.725	6.02	8.262	5.701	-87.798	1.056	11.708	0.00296
570	271.377	87.07	60.078	0.945	760.656	3156.53	1585.08	-0.202	15.271	10.537	11.99	8.273	-7.813	1.274	18.405	0.00465
1362	648.448	136.084	93.898	0.924	900.485	1789.34	1585.34	0.406	24.937	17.207	17.428	12.025	39.768	1.431	27.879	0.00704
989	470.863	112.965	77.946	0.974	4307.59	792.453	1589.39	-0.973	19.632	13.546	16.116	11.12	78.427	1.218	24.31	0.00614
1126	536.089	122.351	84.422	0.945	2371.99	4910.92	1590.31	-1.29	22.548	15.558	15.965	11.016	-78.564	1.412	25.429	0.00642
341	162.35	67.649	46.678	0.936	4588.18	1015.14	1590.54	-0.818	12.05	8.315	9.062	6.253	-76.913	1.33	14.135	0.00357
410	195.201	73.242	50.537	0.96	1034.25	1511.12	1590.64	0.54	12.475	8.608	10.529	7.265	-42.982	1.185	15.703	0.00396
1715	816.512	147.69	101.906	0.988	5302.77	2956.52	1591.21	0.113	24.944	17.211	21.958	15.151	-63.909	1.136	32.166	0.00812
129	61.417	40.183	27.726	1.004	3897.81	4826.97	1592.13	1.176	6.76	4.664	6.18	4.264	71.336	1.094	8.901	0.00225
828	394.211	104.27	71.946	0.957	4365.52	826.255	1593.27	-0.944	17.999	12.419	14.703	10.145	43.216	1.224	22.222	0.00561
649	308.989	91.323	63.013	0.978	1938.2	4742.53	1594.12	-1.088	16.162	11.152	12.818	8.844	-48.472	1.261	19.599	0.00495
77	36.66	34.265	23.643	0.824	3643.55	4918.81	1594.17	1.294	7.296	5.034	3.415	2.356	77.129	2.136	6.035	0.00152
788	375.167	100.573	69.395	0.979	3674.25	4913.33	1596.47	1.28	16.755	11.561	15.091	10.413	32.973	1.11	21.884	0.00552
794	378.023	100.248	69.171	0.993	2506.75	437.81	1596.98	1.351	16.999	11.729	14.9	10.281	-83.183	1.141	21.867	0.00552
95	45.23	35.05	24.185	0.972	804.279	3393.41	1596.98	-0.306	5.79	3.995	5.312	3.665	-89.094	1.09	7.639	0.00193
993	472.767	116.758	80.563	0.915	2151.49	547.78	1596.99	1.19	21.407	14.771	14.994	10.346	-64.812	1.428	23.968	0.00605
980	466.578	112.41	77.563	0.975	3620.69	4929.61	1597.12	1.304	20.193	13.933	15.474	10.677	-83.681	1.305	23.97	0.00605
320	152.352	65.753	45.37	0.93	720.984	3032.29	1597.25	-0.146	12.358	8.527	8.309	5.733	-23.499	1.487	13.457	0.0034
349	166.159	67.879	46.837	0.952	765.683	3259.06	1597.38	-0.245	12.604	8.697	8.873	6.122	33.301	1.42	14.159	0.00357
212	100.933	52.575	36.277	0.964	5101.03	1699.91	1597.48	-0.445	9.407	6.491	7.267	5.014	87.615	1.294	11.223	0.00283
1891	900.305	156.29	107.84	0.973	5246.13	2091.62	1597.49	-0.264	26.386	18.206	22.989	15.862	-65.049	1.148	33.827	0.00854
273	129.975	60.39	41.669	0.941	715.976	3006.96	1598.23	-0.134	10.971	7.57	7.977	5.504	2.185	1.375	12.591	0.00318
742	353.266	103.715	71.563	0.867	2447.43	449.381	1598.65	1.325	20.234	13.961	11.812	8.15	42.892	1.713	19.908	0.00503
1946	926.491	158.186	109.148	0.977	4918.23	4012.98	1598.81	0.604	26.906	18.565	23.047	15.902	-84.71	1.167	34.159	0.00862
1010	480.861	117.313	80.946	0.922	4985.05	1482.2	1598.98	-0.552	22.513	15.534	14.331	9.888	-16.93	1.571	23.593	0.00596
54	25.709	27.236	18.793	0.915	1257.93	1179.22	1599.99	0.713	5.58	3.85	3.136	2.164	86.727	1.779	5.336	0.00135
36	17.14	22.658	15.634	0.881	1250.53	1187.25	1600.24	0.709	4.703	3.245	2.509	1.731	75.168	1.875	4.32	0.00109
1367	650.829	136.314	94.057	0.924	1046.48	1463.81	1600.52	0.56	25.196	17.385	17.323	11.953	53.374	1.454	27.859	0.00703
1056	502.762	119.899	82.73	0.923	4959.4	1436.42	1600.87	-0.574	22.473	15.506	14.996	10.347	-33.382	1.499	24.344	0.00614
291	138.545	60.39	41.669	1.003	5315.23	2992.11	1602.69	0.128	9.873	6.812	9.444	6.516	-35.356	1.045	13.318	0.00336
949	451.819	110.514	76.255	0.976	1273.13	1153.09	1603.99	0.726	19.101	13.18	15.908	10.977	85.513	1.201	23.857	0.00602
137	65.226	42.539	29.352	0.951	3900.92	4845.07	1604.49	1.178	7.195	4.965	6.233	4.301	83.263	1.154	9.195	0.00232
135	64.274	44.206	30.502	0.868	2125.02	546.7	1604.55	1.18	8.83	6.093	4.937	3.407	78.616	1.789	8.411	0.00212
1422	677.014	136.639	94.281	0.957	2095.18	558.85	1604.8	1.166	25.469	17.574	17.794	12.278	62.89	1.431	28.468	0.00719
1165	554.657	125.913	86.88	0.923	760.411	2104.5	1605.99	0.257	23.137	15.965	16.142	11.138	5.993	1.433	25.837	0.00652
78	37.136	32.043	22.11	0.955	838.667	3536.2	1607.21	-0.369	5.449	3.76	4.657	3.213	71.106	1.17	6.909	0.00174
376	179.014	69.775	48.145	0.97	1017.55	1487.04	1609.09	0.545	12.232	8.44	9.824	6.779	41.345	1.245	14.949	0.00377
177	84.27	48.783	33.66	0.935	709.178	2311.43	1610.59	0.166	9.302	6.418	6.189	4.27	77.078	1.503	10.055	0.00254
362	172.348	71.116	49.07	0.899	749.481	3280.51	1611.87	-0.253	13.873	9.572	8.373	5.777	22.758	1.657	13.989	0.00353
109	51.895	36.946	25.493	1.003	5212.07	3480.33	1611.91	0.342	6.367	4.393	5.525	3.812	-7.693	1.152	8.143	0.00206
727	346.125	98.352	67.863	0.944	776.507	3380.48	1612.64	-0.297	17.724	12.23	13.096	9.036	-10.979	1.353	20.556	0.00519
126	59.989	39.858	27.502	0.997	675.071	2593.08	1613.62	0.044	6.543	4.515	6.213	4.287	34.836	1.053	8.793	0.00222
194	92.363	53.361	36.819	0.856	1015.94	3917.97	1614.29	-0.549	10.218	7.05	6.214	4.288	-37.709	1.645	10.362	0.00262
1123	534.66	125.588	86.656	0.895	3925.55	4851.27	1615.01	1.17	21.989	15.172	16.433	11.339	74.918	1.338	25.69	0.00648
1110	528.471	121.565	83.88	0.944	5137.28	1716.38	1615.3	-0.432	22.928	15.82	15.455	10.664	-25.118	1.484	25.011	0.00631
560	266.616	85.96	59.312	0.952	3885.44	4868.89	1615.67	1.188	15.45	10.661	11.614	8.014	79.121	1.33	18.119	0.00457
476	226.624	80.041	55.228	0.934	5283.51	2128.9	1615.97	-0.245	14.729	10.163	10.353	7.144	-43.103	1.423	16.531	0.00417
900	428.49	107.832	74.404	0.973	1224.06	1182.63	1616.21	0.703	18.773	12.953	15.3	10.557	82.016	1.227	23.146	0.00584
402	191.392	74.678	51.528	0.906	673.493	2845.86	1616.42	-0.064	14.179	9.784	9.108	6.285	-14.346	1.557	14.957	0.00378
66	31.423	29.132	20.101	0.977	825.091	3538.65	1616.55	-0.368	5.314	3.667	4.027	2.779	10.363	1.32	6.265	0.00158
281	133.784	60.62	41.828	0.961	2131.2	525.094	1616.73	1.186	10.334	7.13	8.71	6.01	-45.723	1.186	12.997	0.00328
1110	528.471	119.669	82.572	0.974	5116.61	1664.73	1617.72	-0.456	21.396	14.763	16.541	11.413	-26.289	1.293	25.539	0.00645
359	170.92	71.997	49.678	0.87	669.826	2820.92	1617.94	-0.053	13.735	9.477	8.439	5.823	0.124	1.628	14.033	0.00354
244	116.168	57.153	39.436	0.939	4952.95	4012.53	1618.41	0.596	10.591	7.308	7.413	5.115	80.521	1.429	11.853	0.00299
712	338.983	98.907	68.246	0.915	835.885	3574.04	1618.58	-0.383	18.64	12.862	12.271	8.467	-45.824	1.519	20.003	0.00505
662	315.178	92.759	64.004	0.967	878.142	3675.43	1619.48	-0.43	15.94	10.999	13.258	9.148	-21.297	1.202	19.893	0.00502
812	386.593	108.062	74.563	0.874	1474.69	4472.06	1620.2	-0.857	20.592	14.208	12.61	8.701	81.682	1.633	20.987	0.0053
1666	793.183	147.92	102.065	0.957	980.802	1512.18	1622.02	0.528	26.87	18.54	19.824	13.679	33.339	1.355	31.133	0.00786
702	334.222	98.352	67.863	0.912	775.366	3422.47	1622.1	-0.314	18.265	12.603	12.348	8.52	-13.495	1.479	19.964	0.00504
769	366.121	98.677	68.087	0.992	890.07	3711.55	1622.6	-0.446	15.988	11.032	15.414	10.636	-55.221	1.037	21.657	0.00547
589	280.423	92.433	63.779	0.866	659.704	2693.42	1622.65	0.001	17.902	12.352	10.566	7.291	18.702	1.694	17.759	0.00448
1087	517.521	118.558	81.805	0.972	1022.65	3952.32	1622.87	-0.563	20.98	14.476	16.565	11.43	-36.271	1.267	25.373	0.0064
502	239.002	80.041	55.228	0.985	4046.37	4808.88	1623.04	1.115	14.305	9.87	11.201	7.729	-71.729	1.277	17.212	0.00434
212	100.933	52.25	36.053	0.976	690.665	2308.85	1623.48	0.166	8.769	6.051	7.75	5.348	73.522	1.132	11.334	0.00286
985	468.959	114.536	79.03	0.944	985.161	3894.12	1624	-0.534	21.171	14.608	14.866	10.258	-19.119	1.424	23.744	0.00599
829	394.687	105.381	72.713	0.938	2147.58	505.502	1625.09	1.195	19.071	13.159	13.883	9.579	25.662	1.374	21.905	0.00553
159	75.7	56.272	38.828	0.631	997.494	3918.39	1625.31	-0.545	12.534	8.648	4.126	2.847	-31.018	3.038	7.649	0.00193
647	308.037	91.648	63.237	0.968	689.557	2277.9	1627.89	0.178	15.884	10.96	13.002	8.971	-27.423	1.222	19.635	0.00496
255	121.406	57.383	39.594	0.973	1692.39	4653.65	1628.43	-0.978	10.399	7.175	7.855	5.42	50.355	1.324	12.232	0.00309
235	111.884	57.613	39.753	0.89	4072.99	4805.69	1629.24	1.104	10.93	7.542	7.034	4.853	55.346	1.554	11.543	0.00291
504	239.954	81.707	56.378	0.949	651.506	2571.01	1630.61	0.053	14.599	10.073	11.058	7.63	24.962	1.32	17.203	0.00434
576	274.234	89.427	61.705	0.905	1883.01	620.155	1630.62	1.073	16.697	11.521	11.191	7.722	70.852	1.492	18.143	0.00458
120	57.132	40.413	27.885	0.923	1487.6	888.242	1631.67	0.871	7.922	5.466	4.875	3.364	-43.192	1.625	8.103	0.00205
792	377.071	101.493	70.03	0.966	1152.84	4159.36	1631.93	-0.667	17.777	12.266	14.277	9.851	-62.979	1.245	21.724	0.00548
947	450.867	109.173	75.329	0.998	1729.12	4684.58	1632.29	-0.998	18.53	12.786	16.329	11.267	-1.614	1.135	23.909	0.00603
449	213.769	79.716	55.004	0.888	796.431	3527.66	1632.34	-0.359	15.44	10.654	9.303	6.419	-20.581	1.66	15.551	0.00393
1367	650.829	135.949	93.805	0.929	5228.52	3523.28	1632.72	0.357	24.498	16.904	17.866	12.328	24.546	1.371	28.173	0.00711
501	238.526	83.603	57.686	0.901	1125.96	4127.25	1633.06	-0.649	15.751	10.868	10.251	7.073	-86.719	1.536	16.767	0.00423
828	394.211	104.27	71.946	0.957	1416.03	4445.65	1633.47	-0.831	18.621	12.848	14.194	9.794	-44.629	1.312	22.031	0.00556
501	238.526	83.603	57.686	0.901	644.967	2607.44	1633.97	0.038	15.485	10.685	10.343	7.137	11.917	1.497	16.786	0.00424
1229	585.127	128.594	88.73	0.934	5249.54	3470.63	1634.09	0.333	24.845	17.143	15.789	10.894	26.882	1.574	26.006	0.00656
1040	495.144	116.662	80.497	0.96	1289.32	4324.76	1635.22	-0.757	20.467	14.122	16.236	11.203	-45.799	1.261	24.824	0.00627
641	305.18	98.677	68.087	0.827	1855.92	627.02	1635.49	1.062	20.016	13.811	10.281	7.094	77.403	1.947	17.848	0.00451
964	458.96	112.085	77.339	0.964	1259.72	4294.62	1636.04	-0.74	19.635	13.548	15.668	10.811	-43.432	1.253	23.901	0.00603
391	186.155	74.353	51.304	0.889	1454.66	4485.35	1636.18	-0.855	13.919	9.604	9.02	6.224	71.977	1.543	14.773	0.00373
262	124.738	57.708	39.819	0.989	1694.76	4674.85	1639.67	-0.984	10.468	7.223	8.002	5.521	-17.751	1.308	12.407	0.00313
188	89.507	51.465	35.511	0.892	1672.35	4661.28	1640.54	-0.973	9.893	6.826	6.102	4.21	77.288	1.621	10.135	0.00256
171	81.413	47.117	32.511	0.968	1476.55	874.687	1643.73	0.871	8.447	5.828	6.505	4.488	-48.553	1.298	10.057	0.00254
954	454.199	110.744	76.413	0.978	1731.22	686.969	1644.08	1.004	18.914	13.051	16.11	11.116	-75.96	1.174	23.935	0.00604
431	205.199	78.931	54.462	0.869	1105.03	4128.47	1645.09	-0.644	14.022	9.675	10.053	6.937	81.949	1.395	15.946	0.00403
1015	483.242	116.662	80.497	0.937	1774.07	657.833	1645.53	1.025	19.758	13.633	16.592	11.448	55.564	1.191	24.797	0.00626
147	69.987	43.65	30.119	0.97	5373.38	2281.69	1654.74	-0.174	7.073	4.88	6.71	4.63	-47.632	1.054	9.5	0.0024
1048	498.953	115.877	79.955	0.981	1487.27	843.762	1655.4	0.882	18.546	12.797	18.129	12.509	57.276	1.023	25.301	0.00639
132	62.845	50.354	34.744	0.654	1095.64	4143.12	1656.35	-0.647	10.775	7.435	4.075	2.812	71.19	2.644	7.439	0.00188
1003	477.528	117.218	80.88	0.917	4434.86	4631.21	1657.31	0.936	21.345	14.728	15.092	10.413	70.877	1.414	24.049	0.00607
657	312.798	97.701	67.414	0.865	4463.52	4613.43	1659.3	0.922	19.365	13.362	10.843	7.482	55.021	1.786	18.465	0.00466
693	329.937	102.279	70.573	0.832	4481.22	4602.08	1660.5	0.914	20.428	14.095	11.004	7.593	44.957	1.856	18.907	0.00477
1093	520.377	118.558	81.805	0.977	1437.05	874.126	1661.72	0.858	19.786	13.652	17.671	12.193	59.993	1.12	25.722	0.00649
1149	547.039	124.707	86.048	0.928	708.577	1952.43	1669.83	0.313	22.719	15.676	16.307	11.252	-27.033	1.393	25.855	0.00653
123	58.56	43.42	29.96	0.82	5394.09	2269.96	1670.22	-0.177	8.995	6.207	4.442	3.065	16.403	2.025	7.773	0.00196
109	51.895	37.176	25.651	0.991	4793.8	4341.64	1673.63	0.745	6.292	4.341	5.609	3.87	53.926	1.122	8.171	0.00206
512	243.763	81.937	56.537	0.958	608.398	2365.03	1673.76	0.137	15.672	10.814	10.447	7.208	7.419	1.5	16.964	0.00428
527	250.905	84.714	58.453	0.923	710.418	1917.15	1676.27	0.327	16.146	11.141	10.461	7.218	-1.689	1.543	17.134	0.00432
1209	575.605	129.84	89.59	0.901	4653.85	4489.6	1677.8	0.829	24.589	16.966	15.702	10.834	74.497	1.566	25.827	0.00652
899	428.014	109.403	75.488	0.944	4693.19	4463.34	1683.08	0.81	20.484	14.134	14.039	9.687	55.496	1.459	22.6	0.0057
222	105.694	61.731	42.594	0.732	4676.51	4483.18	1685.15	0.821	12.745	8.794	5.665	3.909	70.673	2.25	10.103	0.00255
490	233.289	79.486	54.845	0.975	678.504	1965.92	1686.78	0.304	13.528	9.334	11.581	7.991	81.004	1.168	17.169	0.00433
1012	481.813	116.432	80.338	0.938	5416.06	2241.8	1688.66	-0.187	22.176	15.301	14.565	10.05	-16.256	1.523	23.759	0.006
1183	563.226	127.024	87.647	0.921	5425.85	2295.53	1688.82	-0.165	24.255	16.736	15.557	10.734	-3.947	1.559	25.556	0.00645
844	401.828	107.832	74.404	0.912	4792.76	4378.53	1690.47	0.757	20.553	14.182	13.137	9.065	66.691	1.564	21.604	0.00545
521	248.048	82.818	57.144	0.955	735.078	1789.01	1690.88	0.379	14.909	10.287	11.169	7.707	1.837	1.335	17.446	0.0044
660	314.226	97.336	67.162	0.875	719.602	1827.16	1691.29	0.363	19.628	13.543	10.734	7.406	-5.929	1.829	18.379	0.00464
126	59.989	40.183	27.726	0.981	5124.87	3940.01	1691.98	0.532	6.418	4.428	6.316	4.358	-64.672	1.016	8.785	0.00222
666	317.083	92.989	64.162	0.968	834.243	1567.02	1692.37	0.479	16.616	11.465	12.862	8.875	-61.455	1.292	19.85	0.00501
923	439.44	113.521	78.329	0.9	4824.17	4350.73	1693.3	0.74	21.698	14.972	13.616	9.395	71.344	1.594	22.509	0.00568
120	57.132	39.073	26.96	0.988	5381.5	3340.09	1694.6	0.265	6.763	4.666	5.7	3.933	34.3	1.186	8.506	0.00215
797	379.452	101.263	69.871	0.977	848.063	1513.9	1701.19	0.5	16.584	11.443	15.353	10.594	-77.248	1.08	21.988	0.00555
195	92.84	50.679	34.969	0.954	1252.16	961.362	1704.99	0.779	8.592	5.928	7.315	5.047	67.13	1.175	10.869	0.00274
1105	526.091	124.247	85.73	0.9	670.648	1900.33	1705.99	0.328	24.006	16.564	14.694	10.139	-14.59	1.634	24.459	0.00617
142	67.606	43.65	30.119	0.937	5141.84	3952.23	1706.35	0.533	7.684	5.302	5.961	4.113	37.715	1.289	9.192	0.00232
1169	556.561	122.581	84.581	0.978	5472.07	3005.08	1711.18	0.125	20.616	14.225	18.136	12.514	64.629	1.137	26.575	0.00671
945	449.915	111.069	76.638	0.963	1267.57	932.506	1711.54	0.791	20.033	13.823	15.155	10.457	74.044	1.322	23.588	0.00595
1222	581.794	125.913	86.88	0.969	5413.55	3321.71	1712.71	0.255	21.501	14.836	18.218	12.57	27.209	1.18	27.126	0.00685
111	52.847	38.287	26.418	0.952	4982.13	4205.76	1712.75	0.654	6.808	4.698	5.315	3.667	-2.431	1.281	8.176	0.00206
812	386.593	101.914	70.321	0.982	5470.2	3062.65	1715.29	0.148	16.645	11.485	15.582	10.752	-78.926	1.068	22.201	0.0056
1221	581.318	131.966	91.057	0.881	5140.65	3981.57	1716.01	0.543	23.986	16.55	16.275	11.23	59.157	1.474	26.284	0.00663
579	275.662	89.197	61.546	0.915	562.431	2254.81	1717.04	0.178	16.126	11.127	11.539	7.962	-23.344	1.398	18.314	0.00462
556	264.712	86.515	59.695	0.933	1227.05	960.665	1717.7	0.772	15.279	10.543	11.656	8.043	85.98	1.311	18.087	0.00457
95	45.23	36.621	25.268	0.89	1242.53	941.837	1719.18	0.781	6.609	4.56	4.718	3.255	51.38	1.401	7.493	0.00189
1123	534.66	123.921	85.505	0.919	5501.06	2558.61	1720.53	-0.055	23.069	15.918	15.535	10.719	-26.331	1.485	25.148	0.00635
1069	508.951	117.313	80.946	0.976	5171.62	3942.16	1720.6	0.523	19.681	13.58	17.386	11.996	36.283	1.132	25.429	0.00642
104	49.514	37.176	25.651	0.946	4995.07	4209.78	1721.52	0.652	6.204	4.281	5.509	3.801	-10.078	1.126	8.039	0.00203
1250	595.125	128.824	88.889	0.947	5409.19	3387.03	1721.72	0.28	23.145	15.97	17.221	11.882	15.701	1.344	26.963	0.00681
362	172.348	68.435	47.22	0.971	5496.91	2443.93	1723.86	-0.101	11.72	8.087	9.883	6.819	72.134	1.186	14.745	0.00372
776	369.454	99.693	68.788	0.981	4980.24	4235.45	1724.25	0.663	17.223	11.884	14.453	9.973	57.766	1.192	21.607	0.00545
139	66.178	41.754	28.81	1.002	1003.62	1207.29	1724.87	0.638	7.314	5.047	6.097	4.207	-57.405	1.2	9.14	0.00231
1137	541.326	122.676	84.646	0.949	5293.74	3719.3	1725.71	0.421	22.131	15.27	16.406	11.32	0.913	1.349	25.721	0.00649
1018	484.67	113.751	78.488	0.989	5274.68	3769.02	1728.13	0.442	19.271	13.297	16.899	11.66	44.607	1.14	24.796	0.00626
873	415.635	104.826	72.33	0.998	1107.24	1066.36	1729.6	0.708	17.929	12.371	15.549	10.729	79.082	1.153	22.925	0.00579
298	141.878	61.405	42.369	0.993	1126.08	1039.49	1731.92	0.721	9.876	6.814	9.666	6.67	-24.678	1.022	13.482	0.0034
529	251.857	83.278	57.462	0.959	5018.39	4207.93	1733.57	0.645	14.558	10.045	11.623	8.02	-77.259	1.253	17.727	0.00447
178	84.746	50.354	34.744	0.882	5517.9	2446.02	1738.13	-0.1	9.527	6.574	6.085	4.199	83.367	1.566	10.009	0.00253
825	392.783	106.722	73.638	0.91	1006.96	1165.57	1740.35	0.652	19.726	13.611	13.384	9.235	-89.467	1.474	21.615	0.00546
1016	483.718	114.996	79.347	0.965	963.061	1203.32	1749.04	0.63	19.616	13.535	16.547	11.417	38.309	1.185	24.683	0.00623
135	64.274	43.42	29.96	0.9	526.515	2082.89	1766.06	0.242	8.548	5.898	5.068	3.497	3.059	1.687	8.508	0.00215
572	272.329	88.641	61.162	0.915	520.549	2106.98	1766.16	0.232	16.824	11.609	10.874	7.503	-27.327	1.547	17.823	0.0045
882	419.92	108.618	74.946	0.939	682.382	1597.67	1776.9	0.441	20.311	14.015	13.856	9.561	75.274	1.466	22.339	0.00564
659	313.75	95.115	65.629	0.915	507.09	2064.34	1782.17	0.247	17.995	12.417	11.688	8.065	-20.849	1.54	19.13	0.00483
1422	677.014	135.854	93.739	0.968	654.904	1634.43	1783.5	0.423	23.989	16.552	18.93	13.062	39.863	1.267	29.002	0.00732
527	250.905	83.603	57.686	0.947	853.128	1260.02	1788.91	0.587	14.779	10.198	11.451	7.901	-82.544	1.291	17.666	0.00446
281	133.784	61.961	42.753	0.92	813.966	1282.51	1803.03	0.572	10.768	7.43	8.387	5.787	76.045	1.284	12.913	0.00326
367	174.729	71.116	49.07	0.912	799.598	1295.35	1806.61	0.565	12.894	8.897	9.147	6.311	64.416	1.41	14.559	0.00367
704	335.174	95.67	66.012	0.967	531.594	1832.5	1811.94	0.335	16.509	11.391	13.639	9.411	-72.842	1.21	20.521	0.00518
727	346.125	97.566	67.321	0.96	685.909	1438.31	1824.4	0.496	17.252	11.904	13.456	9.285	-83.853	1.282	20.708	0.00523
817	388.974	102.604	70.797	0.975	652.844	1465.95	1835.59	0.481	17.266	11.914	15.137	10.445	87.237	1.141	22.215	0.00561
537	255.666	82.493	56.92	0.992	504.824	1771.68	1843.5	0.353	13.748	9.486	12.48	8.611	-50.571	1.102	18.034	0.00455
418	199.01	73.567	50.761	0.971	550.871	1655.17	1843.55	0.4	12.325	8.504	11.021	7.604	-23.12	1.118	16.033	0.00405
573	272.805	87.856	60.621	0.933	532.127	1681.78	1848.43	0.389	15.498	10.694	11.93	8.232	-17.842	1.299	18.45	0.00466
